# Supplementary material for: Inhibition of Aurora Kinase B attenuates fibroblast activation and pulmonary fibrosis
Source: PubMed Central journal article supplement (PMC7507328; doi:10.15252/emmm.202012131), 2020-08-06
Supplement: EMMM-12-e12131-s001.pdf [file EMMM-12-e12131-s001.pdf]

# **Inhibition of Aurora Kinase B Attenuates Fibroblast Activation and Pulmonary Fibrosis**

Rajesh K. Kasam<sup>1,2</sup>, Sudhir Ghandikota<sup>3,4</sup>, Divyalakshmi Soundararajan<sup>1</sup>, Geeredy B. Reddy<sup>2</sup>, Steven K. Huang<sup>5</sup>, Anil G. Jegga<sup>3,4,6,\*</sup>, and Satish K. Madala<sup>1,6,\*</sup>

## **Appendix**

Table of contents:

Appendix Fig S1 (Page 2-3)

Appendix Table S1 (Page 4-8)

Appendix Table S2-S6 (Page 9-13)

Appendix Figure S1.

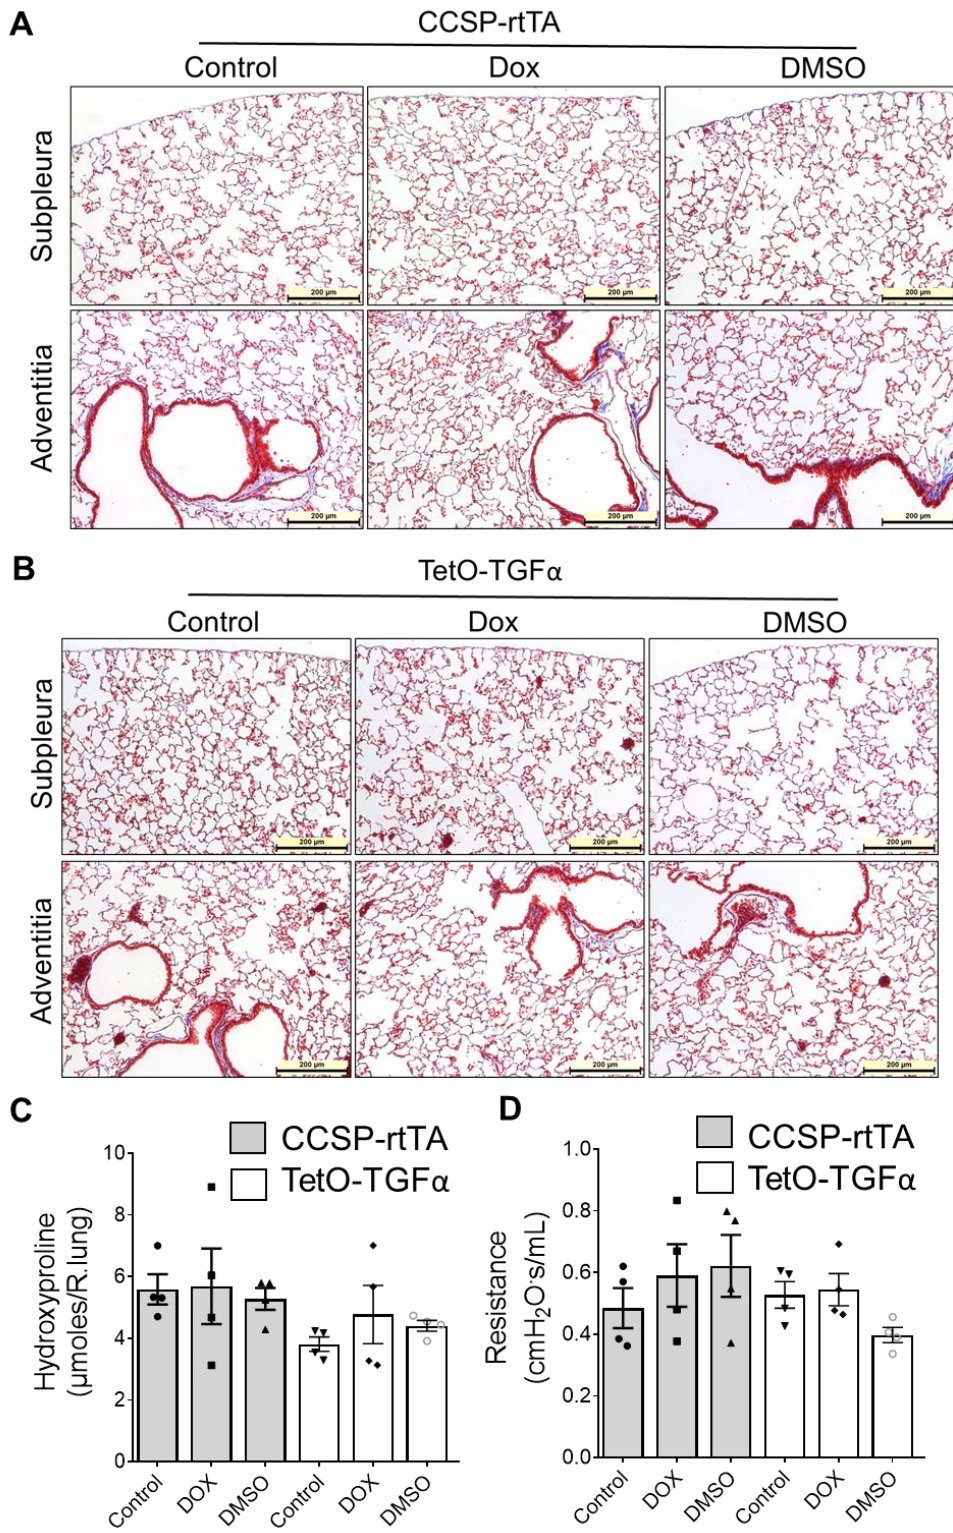

**Appendix Fig S1. Doxycycline or DMSO treatment does not induce fibrosis or inflammation**

CCSP-rtTA and TetO-TGF $\alpha$  mice were either treated with 5% DMSO for 3 wks or fed with DOX-containing food for 6 wks.

(A) Representative images of Masson's trichrome stained lung sections from CCSP-rtTA mice. Images were obtained at 10X magnification. Scale bar, 200  $\mu$ m. (n=4 mice/group).

(B) Representative images of Masson's trichrome stained lung sections from TetO-TGF $\alpha$  mice. Images were obtained at 10X magnification. Scale bar, 200  $\mu$ m. (n=4 mice/group).

(C) Quantification of total lung hydroxyproline levels. (n=4 mice/group).

(D) Resistance was measured using FlexiVent. (n=4 mice/group).

**Appendix Table S1.** The list of IPF genes that are up or down regulated with the knockdown of AURKB in lung fibroblasts isolated from TGF $\alpha$  mice on Dox for 10 days.

| Gene ID | symbol         | Annotation        | log2 FC | pval | padj (FDR) |
|---------|----------------|-------------------|---------|------|------------|
| 17523   | <i>Mpo</i>     | IPF-DN siAURKB-UP | 6.35    | 0    | 0          |
| 12424   | <i>Cck</i>     | IPF-DN siAURKB-UP | 3.68    | 0    | 0          |
| 14058   | <i>F10</i>     | IPF-DN siAURKB-UP | 3.48    | 0    | 0          |
| 20201   | <i>S100a8</i>  | IPF-DN siAURKB-UP | 2.81    | 0    | 0          |
| 20510   | <i>Slc1a1</i>  | IPF-DN siAURKB-UP | 2.21    | 0    | 0.01       |
| 20349   | <i>Sema3e</i>  | IPF-DN siAURKB-UP | 1.91    | 0    | 0          |
| 107869  | <i>Cth</i>     | IPF-DN siAURKB-UP | 1.91    | 0    | 0          |
| 71950   | <i>Nanog</i>   | IPF-DN siAURKB-UP | 1.83    | 0    | 0          |
| 210530  | <i>P3h2</i>    | IPF-DN siAURKB-UP | 1.56    | 0    | 0          |
| 76574   | <i>Mfsd2a</i>  | IPF-DN siAURKB-UP | 1.45    | 0.02 | 0.05       |
| 105349  | <i>Akr1c18</i> | IPF-DN siAURKB-UP | 1.39    | 0    | 0          |
| 108052  | <i>Slc14a1</i> | IPF-DN siAURKB-UP | 1.39    | 0    | 0          |
| 230603  | <i>Ttc39a</i>  | IPF-DN siAURKB-UP | 1.27    | 0.01 | 0.02       |
| 18218   | <i>Dusp8</i>   | IPF-DN siAURKB-UP | 1.19    | 0    | 0          |
| 13113   | <i>Cyp3a13</i> | IPF-DN siAURKB-UP | 1.07    | 0.01 | 0.02       |
| 16169   | <i>Il15ra</i>  | IPF-DN siAURKB-UP | 1.01    | 0    | 0.01       |
| 14226   | <i>Fkbp1b</i>  | IPF-DN siAURKB-UP | 1       | 0    | 0          |
| 57339   | <i>Jph1</i>    | IPF-DN siAURKB-UP | 1       | 0    | 0          |
| 30956   | <i>Aass</i>    | IPF-DN siAURKB-UP | 0.98    | 0    | 0          |
| 15446   | <i>Hpgd</i>    | IPF-DN siAURKB-UP | 0.95    | 0    | 0          |
| 268949  | <i>Dpqr1</i>   | IPF-DN siAURKB-UP | 0.94    | 0    | 0          |
| 56811   | <i>Dkk2</i>    | IPF-DN siAURKB-UP | 0.94    | 0    | 0          |
| 227327  | <i>B3gnt7</i>  | IPF-DN siAURKB-UP | 0.86    | 0    | 0          |
| 23972   | <i>Papss2</i>  | IPF-DN siAURKB-UP | 0.84    | 0    | 0          |
| 236643  | <i>Sytl5</i>   | IPF-DN siAURKB-UP | 0.84    | 0    | 0          |
| 244209  | <i>Cyp2r1</i>  | IPF-DN siAURKB-UP | 0.82    | 0    | 0          |
| 68070   | <i>Pdzd2</i>   | IPF-DN siAURKB-UP | 0.8     | 0    | 0          |
| 74513   | <i>Neto2</i>   | IPF-DN siAURKB-UP | 0.78    | 0    | 0          |
| 243958  | <i>Siglecg</i> | IPF-DN siAURKB-UP | 0.77    | 0    | 0          |
| 16194   | <i>Il6ra</i>   | IPF-DN siAURKB-UP | 0.77    | 0    | 0          |
| 100342  | <i>Fam46b</i>  | IPF-DN siAURKB-UP | 0.76    | 0    | 0          |
| 22339   | <i>Vegfa</i>   | IPF-DN siAURKB-UP | 0.75    | 0    | 0          |
| 27222   | <i>Atp1a4</i>  | IPF-DN siAURKB-UP | 0.74    | 0.02 | 0.04       |
| 19088   | <i>Prkar2b</i> | IPF-DN siAURKB-UP | 0.73    | 0    | 0          |
| 12064   | <i>Bdnf</i>    | IPF-DN siAURKB-UP | 0.72    | 0    | 0          |
| 11555   | <i>Adrb2</i>   | IPF-DN siAURKB-UP | 0.7     | 0.01 | 0.02       |
| 70484   | <i>Slc35d2</i> | IPF-DN siAURKB-UP | 0.69    | 0    | 0          |
| 67606   | <i>Fibin</i>   | IPF-DN siAURKB-UP | 0.69    | 0    | 0          |

|        |                   |                   |       |      |      |
|--------|-------------------|-------------------|-------|------|------|
| 52626  | <i>Cdkn2aipnl</i> | IPF-DN siAURKB-UP | 0.68  | 0    | 0    |
| 22439  | <i>Xk</i>         | IPF-DN siAURKB-UP | 0.67  | 0    | 0    |
| 14167  | <i>Fgf12</i>      | IPF-DN siAURKB-UP | 0.65  | 0    | 0.01 |
| 71091  | <i>Cdkl1</i>      | IPF-DN siAURKB-UP | 0.64  | 0    | 0    |
| 83554  | <i>Fstl3</i>      | IPF-DN siAURKB-UP | 0.64  | 0    | 0    |
| 26568  | <i>Slc27a3</i>    | IPF-DN siAURKB-UP | 0.64  | 0    | 0    |
| 84682  | <i>Cox4i2</i>     | IPF-DN siAURKB-UP | 0.63  | 0.01 | 0.04 |
| 16475  | <i>Ajuba</i>      | IPF-DN siAURKB-UP | 0.62  | 0    | 0    |
| 30963  | <i>Hacd1</i>      | IPF-DN siAURKB-UP | 0.62  | 0    | 0    |
| 17756  | <i>Map2</i>       | IPF-DN siAURKB-UP | 0.62  | 0.01 | 0.02 |
| 233733 | <i>Galnt18</i>    | IPF-DN siAURKB-UP | 0.6   | 0.01 | 0.02 |
| 71761  | <i>Amdhd1</i>     | IPF-DN siAURKB-UP | 0.59  | 0    | 0.02 |
| 228026 | <i>Pdk1</i>       | IPF-UP siAURKB-DN | -0.59 | 0    | 0    |
| 70974  | <i>Pgm2l1</i>     | IPF-UP siAURKB-DN | -0.59 | 0    | 0    |
| 68867  | <i>Rnf122</i>     | IPF-UP siAURKB-DN | -0.6  | 0    | 0    |
| 13038  | <i>Ctsk</i>       | IPF-UP siAURKB-DN | -0.61 | 0    | 0    |
| 12628  | <i>Cfh</i>        | IPF-UP siAURKB-DN | -0.61 | 0    | 0    |
| 22782  | <i>Slc30a1</i>    | IPF-UP siAURKB-DN | -0.61 | 0    | 0    |
| 192897 | <i>Itgb4</i>      | IPF-UP siAURKB-DN | -0.61 | 0    | 0    |
| 14667  | <i>Gm2a</i>       | IPF-UP siAURKB-DN | -0.62 | 0    | 0    |
| 13078  | <i>Cyp1b1</i>     | IPF-UP siAURKB-DN | -0.62 | 0    | 0    |
| 12819  | <i>Coll5a1</i>    | IPF-UP siAURKB-DN | -0.63 | 0    | 0    |
| 12494  | <i>Cd38</i>       | IPF-UP siAURKB-DN | -0.63 | 0    | 0    |
| 75869  | <i>Arl5b</i>      | IPF-UP siAURKB-DN | -0.63 | 0    | 0    |
| 30878  | <i>Apln</i>       | IPF-UP siAURKB-DN | -0.63 | 0    | 0    |
| 223753 | <i>Cerk</i>       | IPF-UP siAURKB-DN | -0.64 | 0    | 0    |
| 211770 | <i>Trib1</i>      | IPF-UP siAURKB-DN | -0.64 | 0    | 0    |
| 74782  | <i>Glt8d2</i>     | IPF-UP siAURKB-DN | -0.65 | 0    | 0    |
| 20315  | <i>Cxcl12</i>     | IPF-UP siAURKB-DN | -0.66 | 0    | 0    |
| 269356 | <i>Slc4a11</i>    | IPF-UP siAURKB-DN | -0.66 | 0.01 | 0.02 |
| 15465  | <i>Hrh1</i>       | IPF-UP siAURKB-DN | -0.67 | 0.01 | 0.02 |
| 23893  | <i>Grem2</i>      | IPF-UP siAURKB-DN | -0.67 | 0    | 0    |
| 213311 | <i>Fbxl21</i>     | IPF-UP siAURKB-DN | -0.67 | 0.01 | 0.04 |
| 114886 | <i>Cygb</i>       | IPF-UP siAURKB-DN | -0.67 | 0    | 0    |
| 211550 | <i>Tifa</i>       | IPF-UP siAURKB-DN | -0.68 | 0    | 0    |
| 22704  | <i>Zfp46</i>      | IPF-UP siAURKB-DN | -0.68 | 0    | 0    |
| 12870  | <i>Cp</i>         | IPF-UP siAURKB-DN | -0.69 | 0    | 0    |
| 98952  | <i>Fam102a</i>    | IPF-UP siAURKB-DN | -0.69 | 0    | 0    |
| 13653  | <i>Egr1</i>       | IPF-UP siAURKB-DN | -0.7  | 0    | 0    |
| 79221  | <i>Hdac9</i>      | IPF-UP siAURKB-DN | -0.71 | 0    | 0.01 |
| 22031  | <i>Traf3</i>      | IPF-UP siAURKB-DN | -0.71 | 0    | 0    |

|        |                   |                   |       |      |      |
|--------|-------------------|-------------------|-------|------|------|
| 18190  | <i>Nrxn2</i>      | IPF-UP siAURKB-DN | -0.71 | 0    | 0    |
| 12043  | <i>Bcl2</i>       | IPF-UP siAURKB-DN | -0.71 | 0    | 0    |
| 17150  | <i>Mfap2</i>      | IPF-UP siAURKB-DN | -0.72 | 0    | 0    |
| 23796  | <i>Aplnr</i>      | IPF-UP siAURKB-DN | -0.73 | 0.02 | 0.05 |
| 67405  | <i>Nts</i>        | IPF-UP siAURKB-DN | -0.73 | 0    | 0    |
| 69538  | <i>Antxr1</i>     | IPF-UP siAURKB-DN | -0.74 | 0    | 0    |
| 319757 | <i>Smo</i>        | IPF-UP siAURKB-DN | -0.74 | 0    | 0    |
| 11932  | <i>Atp1b2</i>     | IPF-UP siAURKB-DN | -0.75 | 0    | 0    |
| 14962  | <i>Cfb</i>        | IPF-UP siAURKB-DN | -0.75 | 0    | 0    |
| 93890  | <i>Pcdhb19</i>    | IPF-UP siAURKB-DN | -0.75 | 0    | 0    |
| 29863  | <i>Pde7b</i>      | IPF-UP siAURKB-DN | -0.75 | 0    | 0    |
| 629059 | <i>Fam124a</i>    | IPF-UP siAURKB-DN | -0.76 | 0    | 0    |
| 67896  | <i>Ccdc80</i>     | IPF-UP siAURKB-DN | -0.76 | 0    | 0    |
| 353211 | <i>Prune2</i>     | IPF-UP siAURKB-DN | -0.77 | 0    | 0    |
| 16181  | <i>Illrn</i>      | IPF-UP siAURKB-DN | -0.77 | 0.02 | 0.05 |
| 74645  | <i>Fam46c</i>     | IPF-UP siAURKB-DN | -0.77 | 0    | 0    |
| 215748 | <i>Cnksr3</i>     | IPF-UP siAURKB-DN | -0.77 | 0    | 0    |
| 12142  | <i>Prdm1</i>      | IPF-UP siAURKB-DN | -0.78 | 0.01 | 0.04 |
| 55987  | <i>Cpxm2</i>      | IPF-UP siAURKB-DN | -0.78 | 0    | 0    |
| 17540  | <i>Mrvl1</i>      | IPF-UP siAURKB-DN | -0.8  | 0    | 0    |
| 171463 | <i>Il17rd</i>     | IPF-UP siAURKB-DN | -0.81 | 0    | 0    |
| 26941  | <i>Slc9a3r1</i>   | IPF-UP siAURKB-DN | -0.82 | 0    | 0    |
| 19737  | <i>Rgs5</i>       | IPF-UP siAURKB-DN | -0.82 | 0    | 0    |
| 20361  | <i>Sema7a</i>     | IPF-UP siAURKB-DN | -0.82 | 0    | 0    |
| 93892  | <i>Pcdhb21</i>    | IPF-UP siAURKB-DN | -0.85 | 0    | 0    |
| 21858  | <i>Timp2</i>      | IPF-UP siAURKB-DN | -0.86 | 0    | 0    |
| 56847  | <i>Aldh1a3</i>    | IPF-UP siAURKB-DN | -0.87 | 0.01 | 0.03 |
| 19219  | <i>Ptger4</i>     | IPF-UP siAURKB-DN | -0.87 | 0    | 0    |
| 80718  | <i>Rab27b</i>     | IPF-UP siAURKB-DN | -0.88 | 0    | 0    |
| 14579  | <i>Gem</i>        | IPF-UP siAURKB-DN | -0.88 | 0    | 0    |
| 66695  | <i>Aspn</i>       | IPF-UP siAURKB-DN | -0.89 | 0    | 0    |
| 11816  | <i>Apoe</i>       | IPF-UP siAURKB-DN | -0.89 | 0    | 0    |
| 28109  | <i>D10Wsu102e</i> | IPF-UP siAURKB-DN | -0.89 | 0    | 0    |
| 320916 | <i>Wscd2</i>      | IPF-UP siAURKB-DN | -0.9  | 0    | 0.01 |
| 53901  | <i>Rcan2</i>      | IPF-UP siAURKB-DN | -0.9  | 0    | 0    |
| 22329  | <i>Vcam1</i>      | IPF-UP siAURKB-DN | -0.9  | 0    | 0    |
| 20897  | <i>Stra6</i>      | IPF-UP siAURKB-DN | -0.91 | 0    | 0    |
| 16416  | <i>Itgb3</i>      | IPF-UP siAURKB-DN | -0.91 | 0    | 0    |
| 20429  | <i>Shox2</i>      | IPF-UP siAURKB-DN | -0.92 | 0.01 | 0.02 |
| 238377 | <i>Gpr68</i>      | IPF-UP siAURKB-DN | -0.93 | 0    | 0    |
| 14089  | <i>Fap</i>        | IPF-UP siAURKB-DN | -0.95 | 0    | 0    |

|        |                 |                   |       |      |      |
|--------|-----------------|-------------------|-------|------|------|
| 50706  | <i>Postn</i>    | IPF-UP siAURKB-DN | -0.97 | 0    | 0    |
| 12818  | <i>Coll4a1</i>  | IPF-UP siAURKB-DN | -0.97 | 0    | 0    |
| 101772 | <i>Ano1</i>     | IPF-UP siAURKB-DN | -0.98 | 0    | 0.01 |
| 16324  | <i>Inhbb</i>    | IPF-UP siAURKB-DN | -0.98 | 0    | 0    |
| 27528  | <i>Nrep</i>     | IPF-UP siAURKB-DN | -0.99 | 0    | 0    |
| 64074  | <i>Smoc2</i>    | IPF-UP siAURKB-DN | -0.99 | 0    | 0    |
| 72536  | <i>Tagap</i>    | IPF-UP siAURKB-DN | -1.01 | 0    | 0    |
| 69707  | <i>Iqcg</i>     | IPF-UP siAURKB-DN | -1.03 | 0    | 0    |
| 20972  | <i>Syng1</i>    | IPF-UP siAURKB-DN | -1.03 | 0    | 0    |
| 16590  | <i>Kit</i>      | IPF-UP siAURKB-DN | -1.03 | 0    | 0    |
| 14164  | <i>Fgf1</i>     | IPF-UP siAURKB-DN | -1.04 | 0.01 | 0.03 |
| 230779 | <i>Serinc2</i>  | IPF-UP siAURKB-DN | -1.04 | 0.01 | 0.03 |
| 107587 | <i>Osr2</i>     | IPF-UP siAURKB-DN | -1.05 | 0    | 0    |
| 15160  | <i>Serpind1</i> | IPF-UP siAURKB-DN | -1.08 | 0    | 0    |
| 243743 | <i>Plxna4</i>   | IPF-UP siAURKB-DN | -1.09 | 0    | 0    |
| 246316 | <i>Lgi2</i>     | IPF-UP siAURKB-DN | -1.09 | 0    | 0    |
| 21810  | <i>Tgfbi</i>    | IPF-UP siAURKB-DN | -1.1  | 0    | 0    |
| 17470  | <i>Cd200</i>    | IPF-UP siAURKB-DN | -1.11 | 0    | 0    |
| 383619 | <i>Aim2</i>     | IPF-UP siAURKB-DN | -1.11 | 0    | 0.01 |
| 20394  | <i>Scg5</i>     | IPF-UP siAURKB-DN | -1.11 | 0    | 0.02 |
| 20257  | <i>Stmn2</i>    | IPF-UP siAURKB-DN | -1.14 | 0    | 0    |
| 13537  | <i>Dusp2</i>    | IPF-UP siAURKB-DN | -1.15 | 0.01 | 0.03 |
| 30955  | <i>Pik3cg</i>   | IPF-UP siAURKB-DN | -1.16 | 0    | 0.01 |
| 54720  | <i>Rcan1</i>    | IPF-UP siAURKB-DN | -1.18 | 0    | 0    |
| 20284  | <i>Scrg1</i>    | IPF-UP siAURKB-DN | -1.18 | 0    | 0.01 |
| 242341 | <i>Atp6v0d2</i> | IPF-UP siAURKB-DN | -1.18 | 0.01 | 0.02 |
| 56226  | <i>Espn</i>     | IPF-UP siAURKB-DN | -1.21 | 0    | 0    |
| 67731  | <i>Fbxo32</i>   | IPF-UP siAURKB-DN | -1.22 | 0    | 0    |
| 12759  | <i>Clu</i>      | IPF-UP siAURKB-DN | -1.22 | 0    | 0    |
| 15186  | <i>Hdc</i>      | IPF-UP siAURKB-DN | -1.23 | 0.01 | 0.04 |
| 229898 | <i>Gbp5</i>     | IPF-UP siAURKB-DN | -1.26 | 0    | 0    |
| 20296  | <i>Ccl2</i>     | IPF-UP siAURKB-DN | -1.28 | 0    | 0    |
| 16651  | <i>Sspn</i>     | IPF-UP siAURKB-DN | -1.3  | 0    | 0    |
| 19126  | <i>Prom1</i>    | IPF-UP siAURKB-DN | -1.33 | 0    | 0    |
| 66797  | <i>Cntnap2</i>  | IPF-UP siAURKB-DN | -1.34 | 0    | 0.01 |
| 18053  | <i>Ngfr</i>     | IPF-UP siAURKB-DN | -1.36 | 0    | 0.01 |
| 20452  | <i>St8sia4</i>  | IPF-UP siAURKB-DN | -1.37 | 0    | 0    |
| 270190 | <i>Ephb1</i>    | IPF-UP siAURKB-DN | -1.37 | 0    | 0    |
| 96935  | <i>Susd4</i>    | IPF-UP siAURKB-DN | -1.39 | 0.01 | 0.04 |
| 269642 | <i>Nat8l</i>    | IPF-UP siAURKB-DN | -1.41 | 0    | 0    |
| 14064  | <i>F2rl2</i>    | IPF-UP siAURKB-DN | -1.44 | 0.01 | 0.03 |

|        |                |                   |       |      |      |
|--------|----------------|-------------------|-------|------|------|
| 319655 | <i>Podxl2</i>  | IPF-UP siAURKB-DN | -1.45 | 0    | 0    |
| 20292  | <i>Ccl11</i>   | IPF-UP siAURKB-DN | -1.46 | 0    | 0    |
| 229933 | <i>Clca2</i>   | IPF-UP siAURKB-DN | -1.48 | 0    | 0    |
| 20319  | <i>Sfrp2</i>   | IPF-UP siAURKB-DN | -1.48 | 0    | 0    |
| 11931  | <i>Atp1b1</i>  | IPF-UP siAURKB-DN | -1.51 | 0    | 0    |
| 56720  | <i>Tdo2</i>    | IPF-UP siAURKB-DN | -1.51 | 0.01 | 0.02 |
| 270192 | <i>Rab6b</i>   | IPF-UP siAURKB-DN | -1.52 | 0    | 0    |
| 107753 | <i>Lgals2</i>  | IPF-UP siAURKB-DN | -1.53 | 0    | 0    |
| 68498  | <i>Tspan11</i> | IPF-UP siAURKB-DN | -1.58 | 0    | 0.01 |
| 78249  | <i>Adgrf4</i>  | IPF-UP siAURKB-DN | -1.6  | 0    | 0    |
| 56788  | <i>Scube2</i>  | IPF-UP siAURKB-DN | -1.65 | 0    | 0    |
| 54156  | <i>Egfl6</i>   | IPF-UP siAURKB-DN | -1.65 | 0.01 | 0.04 |
| 18039  | <i>Nefl</i>    | IPF-UP siAURKB-DN | -1.69 | 0    | 0    |
| 65255  | <i>Asb4</i>    | IPF-UP siAURKB-DN | -1.75 | 0    | 0    |
| 211134 | <i>Lzts1</i>   | IPF-UP siAURKB-DN | -1.76 | 0.01 | 0.03 |
| 14169  | <i>Fgf14</i>   | IPF-UP siAURKB-DN | -1.76 | 0.01 | 0.03 |
| 12124  | <i>Bik</i>     | IPF-UP siAURKB-DN | -1.76 | 0.01 | 0.02 |
| 66813  | <i>Bcl2l14</i> | IPF-UP siAURKB-DN | -1.8  | 0    | 0    |
| 17022  | <i>Lum</i>     | IPF-UP siAURKB-DN | -1.81 | 0    | 0    |
| 223272 | <i>Itgbl1</i>  | IPF-UP siAURKB-DN | -1.82 | 0    | 0    |
| 22061  | <i>Trp63</i>   | IPF-UP siAURKB-DN | -1.97 | 0.01 | 0.02 |
| 67742  | <i>Samsn1</i>  | IPF-UP siAURKB-DN | -1.98 | 0    | 0    |
| 74186  | <i>Ccdc3</i>   | IPF-UP siAURKB-DN | -2.02 | 0    | 0    |
| 210622 | <i>Pamr1</i>   | IPF-UP siAURKB-DN | -2.02 | 0    | 0    |
| 228543 | <i>Rhov</i>    | IPF-UP siAURKB-DN | -2.12 | 0.01 | 0.02 |
| 11830  | <i>Aqp5</i>    | IPF-UP siAURKB-DN | -2.18 | 0    | 0    |
| 71693  | <i>Colec11</i> | IPF-UP siAURKB-DN | -2.35 | 0    | 0    |
| 21380  | <i>Tbx1</i>    | IPF-UP siAURKB-DN | -2.43 | 0.01 | 0.02 |
| 18155  | <i>Pnoc</i>    | IPF-UP siAURKB-DN | -2.47 | 0    | 0    |
| 69908  | <i>Rab3b</i>   | IPF-UP siAURKB-DN | -2.8  | 0    | 0    |



**Appendix Table S2.** The list of human RT-PCR primers used in the study.

| <b>Gene symbol</b> | <b>Forward</b>        | <b>Reverse</b>          |
|--------------------|-----------------------|-------------------------|
| $\beta$ -actin     | CCAACCGCGAGAAGATGA    | CCAGAGGCGTACAGGGATAG    |
| AURKB              | GATGGCCCAGAAGGAGAACT  | AGGCTCTTTCCGGAGGACT     |
| BAK                | CCTGCCCTCTGCTTCTGA    | CTGCTGATGGCGGTAAAAA     |
| BAX                | AGCAAACCTGGTGCTCAAGG  | CTTGGATCCAGCCCAAC       |
| CCNA2              | GGTACTGAAGTCCGGGAACC  | GAAGATCCTTAAGGGGTGCAA   |
| FAS                | GTGGACCCGCTCAGTACG    | TCTAGCAACAGACGTAAGAACCA |
| PLK1               | AACGACTTCGTGTTTCGTGGT | AGGGCTTTCCTCCTCTTGTG    |
| WT1                | AGCTGTCCCACTTACAGATGC | CCTTGAAGTCACACTGGTATGG  |

**Appendix Table S3.** The list of mouse RT-PCR primers used in the study.

| <b>Gene</b>     | <b>Forward</b>                  | <b>Reverse</b>            |
|-----------------|---------------------------------|---------------------------|
| Hprt            | GCCCTTGACTATAATGAGTACTTC<br>AGG | TTCAACTTGCGCTCATCTTAGG    |
| Aurka           | GGGACATGGCTGTTGAGG              | GTTTTCTTTACATCTGTCCATGTCA |
| Aurkb           | ATTGCAGACTTTGGCTGGTC            | AATCATCTCTGGGGGCAGAT      |
| Bak             | GGAATGCCTACGAACTCTTCA           | CCAGCTGATGCCACTCTTAAA     |
| Bax             | GTGAGCGGCTGCTTGTCT              | GGTCCCGAAGTAGGAGAGGA      |
| Col1 $\alpha$ 1 | AGACATGTTTCAGCTTTGTGGAC         | GCAGCTGACTTCAGGGATG       |
| Col3 $\alpha$   | CTCCTGGTGAGCGAGGAC              | GACCAGGTTGCCCATCACT       |
| Col5 $\alpha$   | CTACATCCGTGCCCTGGT              | CCAGCACCGTCTTCTGGTAG      |
| Col14           | ACGACGTGACTGAGAACAGC            | AATGTCTGTGTGTCTCTCCAA     |
| Col15           | CCAGGGCTAAAAGGAGAACA            | GGACGTCCCCAGTCAAGA        |
| Fn1             | CGGAGAGAGTGCCCCTACTA            | CGATATTGGTGAATCGCAGA      |
| Fas             | AAACCAGACTTCTACTGCGATTCT        | GGGTTCCATGTTACACGA        |
| CcnA2           | CTTGGCTGCACCAACAGTAA            | CAAACCTCAGTTCTCCCAAAAACA  |
| Ccnb1           | GCGCTGAAAATTCTTGACAAC           | TTCTTAGCCAGGTGCTGCAT      |

|      |                                       |                           |
|------|---------------------------------------|---------------------------|
| Plk1 | TTGTAGTTTTGGAGCTCTGTCG                | CAGTGCCTTCCTCCTCTTGT      |
| Wt1  | CAG ATG AAC CTA GGA GCT ACC<br>TTA AA | TGC CCT TCT GTC CAT TTC A |

**Appendix Table S4.** Antibodies and their dilutions used for Immunostaining.

| Antibody     | Dilution | Catalogue# | Company                   |
|--------------|----------|------------|---------------------------|
| Aurkb        | 1:600    | Ab2254     | Abcam                     |
| Vimentin     | 1:100    | Sc-7557    | Santa Cruz Biotechnology  |
| PCNA         | 1:2000   | 2586       | Cell Signaling Technology |
| Ki-67        | 1:100    | 556003     | BD Biosciences            |
| Ki-67        | 1:600    | 12202      | Cell Signaling Technology |
| $\alpha$ SMA | 1:2000   | A5228      | Sigma                     |

**Appendix Table S5.** Antibodies and their dilutions used for immunoblotting.

| Antibody     | Dilution | Catalogue# | Company                   |
|--------------|----------|------------|---------------------------|
| Aurka        | 1:500    | Ab13824    | Abcam                     |
| Aurkb        | 1:1000   | 3094S      | Cell Signaling Technology |
| WT1          | 1:500    | 12609-1-AP | Proteintech               |
| PCNA         | 1:1000   | 2586S      | Cell Signaling Technology |
| Col1         | 1:300    | Sc-25974   | Santa Cruz Biotechnology  |
| Fn1          | 1:500    | SC-9068    | Santa Cruz Biotechnology  |
| GAPDH        | 1:2000   | A300-641   | Bethyl Laboratories       |
| $\alpha$ Sma | 1:20,000 | A2547      | Sigma                     |

**Appendix Table S6.** P values and statistical test used to compare between groups in figures.

| Figure 1 | P value | Comparison                          | Statistical test |
|----------|---------|-------------------------------------|------------------|
| 1A       | <0.0001 | Media vs TGF $\alpha$               | One-way ANOVA    |
|          | 0.0152  | Media vs CTGF                       | One-way ANOVA    |
|          | 0.0005  | Media vs IGF1                       | One-way ANOVA    |
| 1B       | 0.0028  | Normal vs IPF                       | Unpaired t test  |
| 1D       | 0.0223  | Aurkb: Normal lung vs Fibrotic lung | Unpaired t test  |
|          | 0.5492  | Aurka: Normal lung vs Fibrotic lung | Unpaired t test  |

|                 |                |                                                               |                         |
|-----------------|----------------|---------------------------------------------------------------|-------------------------|
| 1F              | 0.0025         | Saline vs Bleomycin                                           | Unpaired t test         |
| <b>Figure 2</b> | <b>P value</b> | <b>Comparison</b>                                             | <b>Statistical test</b> |
| 2A              | <0.0001        | siControl vs siWT1                                            | Unpaired t test         |
| 2B              | <0.0001        | siControl vs siWt1                                            | Unpaired t test         |
| 2C              | 0.0097         | Ad-Control vs Ad-WT1                                          | Unpaired t test         |
| 2D              | <0.0001        | Media: Sc siRNA vs WT1 siRNA                                  | One-way ANOVA           |
|                 | <0.0001        | Media vs TGF $\alpha$ : Sc siRNA vs Sc siRNA                  | One-way ANOVA           |
|                 | <0.0001        | TGF $\alpha$ : Sc siRNA vs WT1 siRNA                          | One-way ANOVA           |
| 2E              | 0.0004         | IgG ctrl vs Anti-Wt1                                          | Unpaired t test         |
| 2F              | <0.0001        | Con vs WT1 <sup>OE</sup> : Emp-Luc vs AURKB-Luc               | One-way ANOVA           |
|                 | <0.0001        | Con vs WT1 <sup>OE</sup> : AURKB-Luc vs AURKB-Luc             | One-way ANOVA           |
|                 | <0.0001        | WT1 <sup>OE</sup> vs WT1 <sup>OE</sup> : Emp-Luc vs AURKB-Luc | One-way ANOVA           |
| <b>Figure 3</b> | <b>P value</b> | <b>Comparison</b>                                             | <b>Statistical test</b> |
| 3D              | <0.0001        | Normal vs Fibrosis                                            | Unpaired t test         |
| 3E              | <0.0001        | siControl vs siAURKB                                          | Unpaired t test         |
|                 | <0.0001        | siControl vs siAurkb                                          | Unpaired t test         |
| 3F              | <0.0001        | Media vs TGF $\alpha$ (siControl)                             | One-way ANOVA           |
|                 | <0.0001        | siControl vs siAurkb (TGF $\alpha$ )                          | One-way ANOVA           |
| 3G              | 0.0013         | CCNA2: siControl vs siAURKB                                   | Unpaired t test         |
|                 | 0.0002         | PLK1: siControl vs siAURKB                                    | Unpaired t test         |
| 3I              | <0.0001        | siControl vs siAURKB                                          | 2way ANOVA              |
|                 | <0.0001        | siControl vs siAurkb                                          | 2way ANOVA              |
| 3J              | 0.0032         | BAK: siControl vs siAURKB                                     | Unpaired t test         |
|                 | 0.0007         | BAX: siControl vs siAURKB                                     | Unpaired t test         |
|                 | 0.0003         | FAS: siControl vs siAURKB                                     | Unpaired t test         |
| 3K              | 0.0341         | Bak: siControl vs siAurkb                                     | Unpaired t test         |
|                 | 0.0488         | Bax: siControl vs siAurkb                                     | Unpaired t test         |
|                 | 0.0087         | Fas: siControl vs siAurkb                                     | Unpaired t test         |
| <b>Figure 4</b> | <b>P value</b> | <b>Comparison</b>                                             | <b>Statistical test</b> |
| 4A              | <0.0001        | Vehicle vs Barasertib (1 $\mu$ M)                             | One way ANOVA           |
|                 | <0.0001        | Vehicle vs Barasertib (2 $\mu$ M)                             | One way ANOVA           |
|                 | <0.0001        | Vehicle vs Barasertib (5 $\mu$ M)                             | One way ANOVA           |
| 4B              | 0.0001         | Vehicle vs Barasertib (5 $\mu$ M)                             | One way ANOVA           |
| 4C              | <0.0001        | Vehicle vs Barasertib                                         | Unpaired t test         |
| 4D              | 0.0018         | TGF $\alpha$ vs TGF $\alpha$ +Barasertib (5 $\mu$ M)          | One way ANOVA           |

|                 |                |                                                               |                         |
|-----------------|----------------|---------------------------------------------------------------|-------------------------|
| 4E              | <0.0001        | Vehicle vs Barasertib                                         | 2Way ANOVA              |
| <b>Figure 5</b> | <b>P value</b> | <b>Comparison</b>                                             | <b>Statistical test</b> |
| 5C              | <0.0001        | Control+Vehicle vs TGF $\alpha$ +Vehicle                      | One way ANOVA           |
|                 | 0.0006         | TGF $\alpha$ +Vehicle vs TGF $\alpha$ +Barasertib             | One way ANOVA           |
| 5D              | 0.0002         | Control+Vehicle vs TGF $\alpha$ +Vehicle                      | One way ANOVA           |
|                 | 0.0222         | TGF $\alpha$ +Vehicle vs TGF $\alpha$ +Barasertib             | One way ANOVA           |
| 5E              | <0.0001        | Col1 $\alpha$ 1: Control+Veh vs TGF $\alpha$ +Veh             | One way ANOVA           |
|                 | <0.0001        | Col1 $\alpha$ 1:TGF $\alpha$ +Veh vs TGF $\alpha$ +Barasertib | One way ANOVA           |
|                 | <0.0001        | Col5 $\alpha$ :Control+Veh vs TGF $\alpha$ +Veh               | One way ANOVA           |
|                 | 0.0004         | Col5 $\alpha$ :TGF $\alpha$ +Veh vs TGF $\alpha$ +Barasertib  | One way ANOVA           |
|                 | <0.0001        | Fn1:Control+Veh vs TGF $\alpha$ +Veh                          | One way ANOVA           |
|                 | <0.0001        | Fn1:TGF $\alpha$ +Veh vs TGF $\alpha$ +Barasertib             | One way ANOVA           |
| <b>Figure 6</b> | <b>P value</b> | <b>Comparison</b>                                             | <b>Statistical test</b> |
| 6B              | 0.0018         | Normal+Vehicle vs TGF $\alpha$ +Vehicle                       | One way ANOVA           |
|                 | 0.0011         | TGF $\alpha$ +Vehicle vs TGF $\alpha$ +Barasertib             | One way ANOVA           |
| 6C              | <0.0001        | Aurkb: Control+Veh vs TGF $\alpha$ +Veh                       | One way ANOVA           |
|                 | 0.0001         | Aurkb:TGF $\alpha$ +Veh vs TGF $\alpha$ +Barasertib           | One way ANOVA           |
|                 | 0.0046         | CcnA2:Control+Veh vs TGF $\alpha$ +Veh                        | One way ANOVA           |
|                 | 0.0052         | CcnA2:TGF $\alpha$ +Veh vs TGF $\alpha$ +Barasertib           | One way ANOVA           |
|                 | <0.0001        | Plk1:Control+Veh vs TGF $\alpha$ +Veh                         | One way ANOVA           |
|                 | 0.0093         | Plk1:TGF $\alpha$ +Veh vs TGF $\alpha$ +Barasertib            | One way ANOVA           |
| <b>Figure 7</b> | <b>P value</b> | <b>Comparison</b>                                             | <b>Statistical test</b> |
| 7B              | <0.0001        | Control+Vehicle vs TGF $\alpha$ +Vehicle                      | One way ANOVA           |
|                 | 0.0025         | TGF $\alpha$ +Vehicle vs TGF $\alpha$ +Barasertib             | One way ANOVA           |
| 7C              | 0.0116         | Normal+Vehicle vs TGF $\alpha$ +Vehicle                       | One way ANOVA           |
|                 | 0.0041         | TGF $\alpha$ +Vehicle vs TGF $\alpha$ +Barasertib             | One way ANOVA           |
|                 | 0.0007         | Normal+Vehicle vs TGF $\alpha$ +Vehicle                       | One way ANOVA           |
|                 | 0.0014         | TGF $\alpha$ +Vehicle vs TGF $\alpha$ +Barasertib             | One way ANOVA           |
| 7E              | 0.0010         | Resistance: Normal+Vehicle vs TGF $\alpha$ +Vehicle           | One way ANOVA           |
|                 | 0.0275         | Resistance: TGF $\alpha$ +Vehicle vs TGF $\alpha$ +Barasertib | One way ANOVA           |
|                 | 0.0001         | Elastance: Normal +Vehicle vs TGF $\alpha$ +Vehicle           | One way ANOVA           |
|                 | 0.0130         | Elastance: TGF $\alpha$ +Vehicle vs TGF $\alpha$ +Barasertib  | One way ANOVA           |

|                   |                |                                                                |                         |
|-------------------|----------------|----------------------------------------------------------------|-------------------------|
|                   | <0.0001        | Compliance: Normal +Vehicle vs TGF $\alpha$ +Vehicle           | One way ANOVA           |
|                   | 0.0205         | Compliance : TGF $\alpha$ +Vehicle vs TGF $\alpha$ +Barasertib | One way ANOVA           |
| <b>Figure 8</b>   | <b>P value</b> | <b>Comparison</b>                                              | <b>Statistical test</b> |
| 8C                | 0.0008         | Veh vs Veh+ Bleomycin                                          | One way ANOVA           |
|                   | 0.0466         | Veh vs Bleomycin +Barasertib                                   | One way ANOVA           |
| 8D                | 0.0089         | Col1 $\alpha$ 1: Vehicle vs Barasertib                         | Unpaired t test         |
|                   | 0.0027         | Col3 $\alpha$ : Vehicle vs Barasertib                          | Unpaired t test         |
|                   | 0.0025         | Col5 $\alpha$ : Vehicle vs Barasertib                          | Unpaired t test         |
|                   | 0.0004         | Col14: Vehicle vs Barasertib                                   | Unpaired t test         |
|                   | <0.0001        | Col15: Vehicle vs Barasertib                                   | Unpaired t test         |
|                   | 0.0440         | Ccna2: Vehicle vs Barasertib                                   | Unpaired t test         |
|                   | 0.0017         | Ccnb1: Vehicle vs Barasertib                                   | Unpaired t test         |
|                   | 0.0197         | Fas: Vehicle vs Barasertib                                     | Unpaired t test         |
| 8E                | 0.0025         | Vehicle vs Barasertib                                          | Unpaired t test         |
| <b>Figure EV2</b> | <b>P value</b> | <b>Comparison</b>                                              | <b>Statistical test</b> |
| EV2A              | 0.0011         | AdenoCtrl vs AdenoWT1                                          | Unpaired t test         |
| <b>Figure EV3</b> | <b>P value</b> | <b>Comparison</b>                                              | <b>Statistical test</b> |
| EV3A              | <0.0001        | siControl vs siAurkb                                           | Unpaired t test         |
| <b>Figure EV4</b> | <b>P value</b> | <b>Comparison</b>                                              | <b>Statistical test</b> |
| EV4               | 0.0111         | CCNA2: Vehicle vs Barasertib                                   | Unpaired t test         |
|                   | 0.0421         | PLK1: Vehicle vs Barasertib                                    | Unpaired t test         |
| <b>Figure EV5</b> | <b>P value</b> | <b>Comparison</b>                                              | <b>Statistical test</b> |
|                   | <0.0001        | Control +Vehicle vs TGF $\alpha$ +Vehicle                      | One way ANOVA           |
|                   | 0.0196         | TGF $\alpha$ +Vehicle vs TGF $\alpha$ +Barasertib              | One way ANOVA           |
