# Supplementary material for: Inhibition of Aurora Kinase B attenuates fibroblast activation and pulmonary fibrosis
Source: PubMed Central journal article supplement (PMC7507328; doi:10.15252/emmm.202012131), 2020-08-06
Supplement: EMMM-12-e12131-s002.pdf [file EMMM-12-e12131-s002.pdf]

## Expanded View Figures

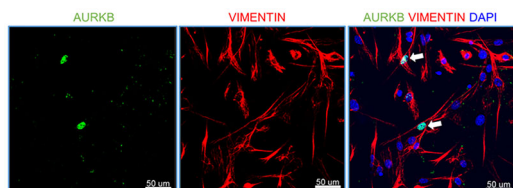

**Figure EV1. Lung-resident fibroblasts show AURKB localized in the nucleus.**

Primary lung-resident fibroblasts were isolated from lung fibroblast cultures of TGF $\alpha$  mice on Dox for 4 weeks. Co-immunostaining was performed using antibodies against AURKB (Green) and Vimentin (Red). All images were obtained at 40 $\times$  magnification. Scale bar, 50  $\mu$ m.

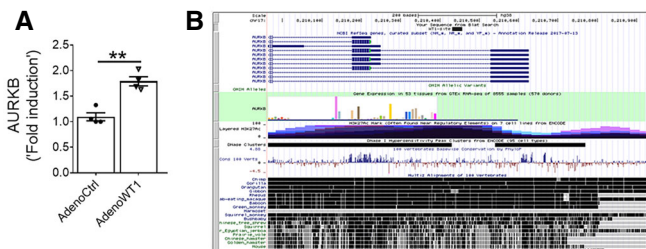

**Figure EV2. WT1 increases AURKB expression.**

A Quantification of AURKB transcripts in non-IPF fibroblasts transduced with control or WT1 adenoviral particles for 72 h ( $n = 4$ ). Data were presented as mean  $\pm$  SEM.  $**P < 0.005$ , unpaired  $t$ -test.

B Schematic illustration of AURKB gene with location of the putative WT1 binding sites that were conserved among mammals including humans and mice.

Data information: All data are presented as mean  $\pm$  SEM.

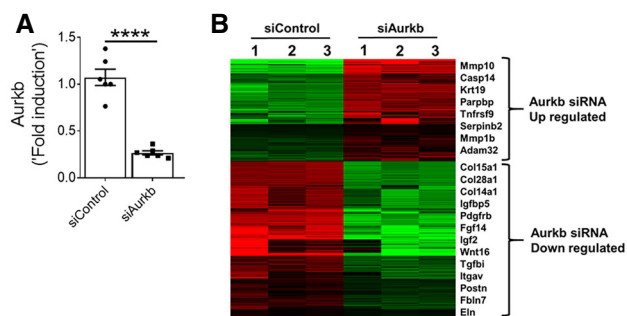

**Figure EV3. The knockdown of AURKB alters IPF-specific gene network.**

A Primary lung-resident fibroblasts isolated from TGF $\alpha$  mice on Dox for 10 days. Cells were transiently transfected with control or Aurkb siRNA, and transcripts were quantified by RT-PCR after 72 h. Data were presented as mean  $\pm$  SEM.  $****P < 0.00005$ , unpaired  $t$ -test ( $n = 3$ ).

B Heat map shows two clusters of differentially expressed genes up- or downregulated (indicated with color key) by twofold or more upon genetic knockdown of Aurkb compared to control siRNA. ( $n = 3$ ).

Data information: All data were presented as mean  $\pm$  SEM.

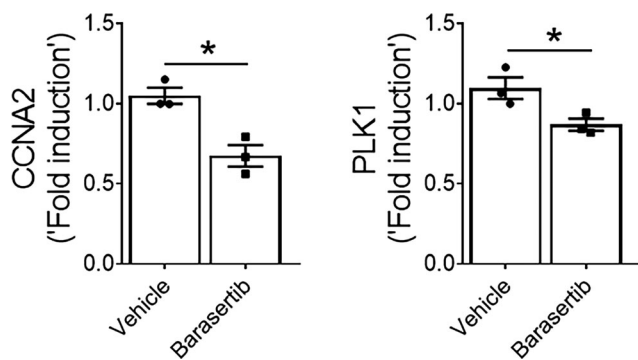

**Figure EV4. Barasertib treatment attenuates the expression of fibroproliferative genes.**

Quantification of CCNA2 and PLK1 transcripts in IPF fibroblasts treated with vehicle or barasertib (1  $\mu$ M) for 16 h. Data were presented as mean  $\pm$  SEM. ( $n = 4$ ).  $*P < 0.05$ , unpaired  $t$ -test.

Data information: All data were presented as mean  $\pm$  SEM.

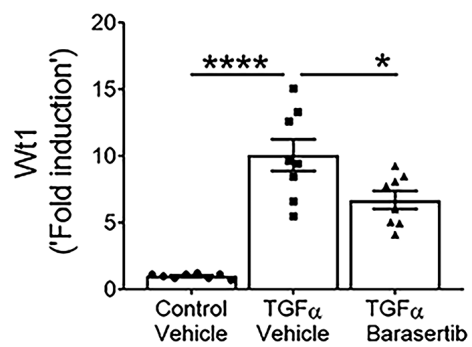

**Figure EV5. Barasertib inhibits Wt1 expression in the lungs of TGF $\alpha$  mice.**

Quantification of Wt1 gene transcripts in total lung transcripts of mice treated with vehicle or barasertib for 4 weeks. Data were presented as mean  $\pm$  SEM.

\* $P < 0.05$ , \*\*\*\* $P < 0.00005$ , 1-way ANOVA, ( $n = 8$  mice/group).
