# Supplementary material for: Inhibition of Aurora Kinase B attenuates fibroblast activation and pulmonary fibrosis
Source: PubMed Central journal article supplement (PMC7507328; doi:10.15252/emmm.202012131), 2020-08-06

**Figure 1**

Panel D

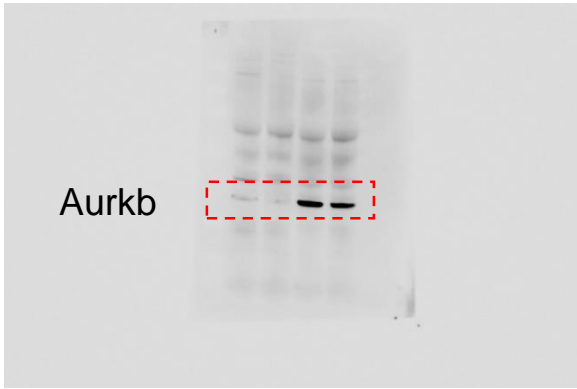

Panel D

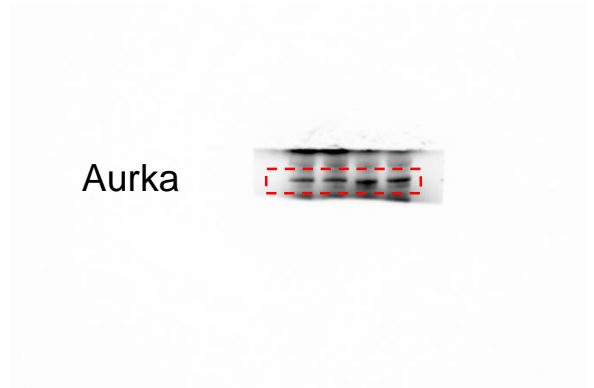

Panel D

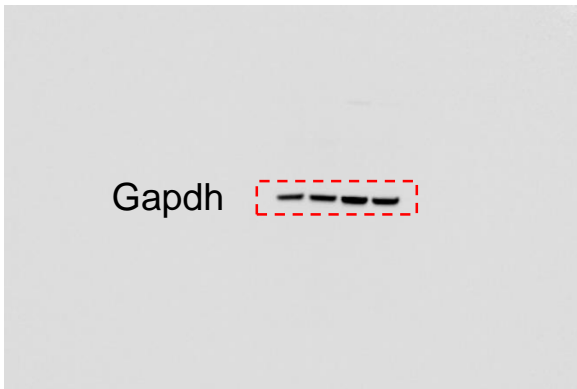

Panel F

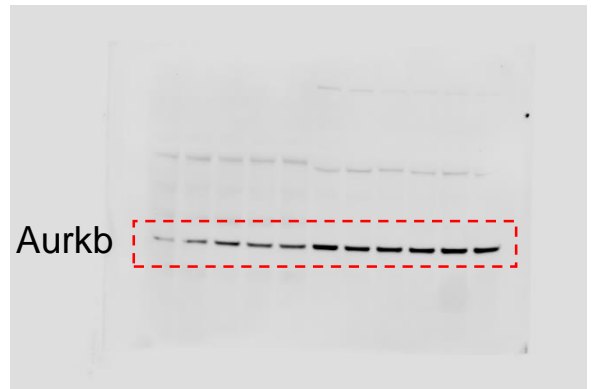

Panel F

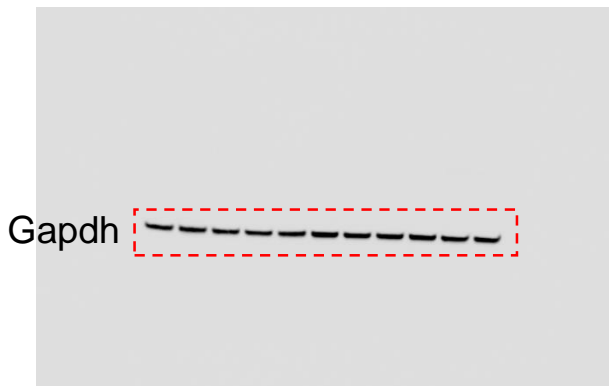

**Figure 1**

Panel D: Biological replicates

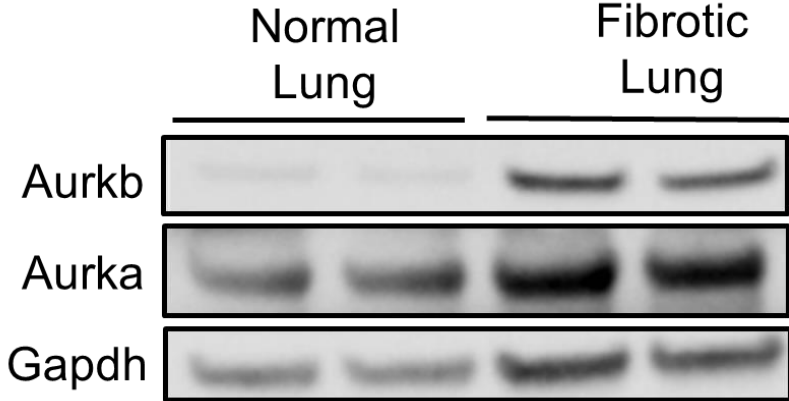

Panel C: Low magnification images

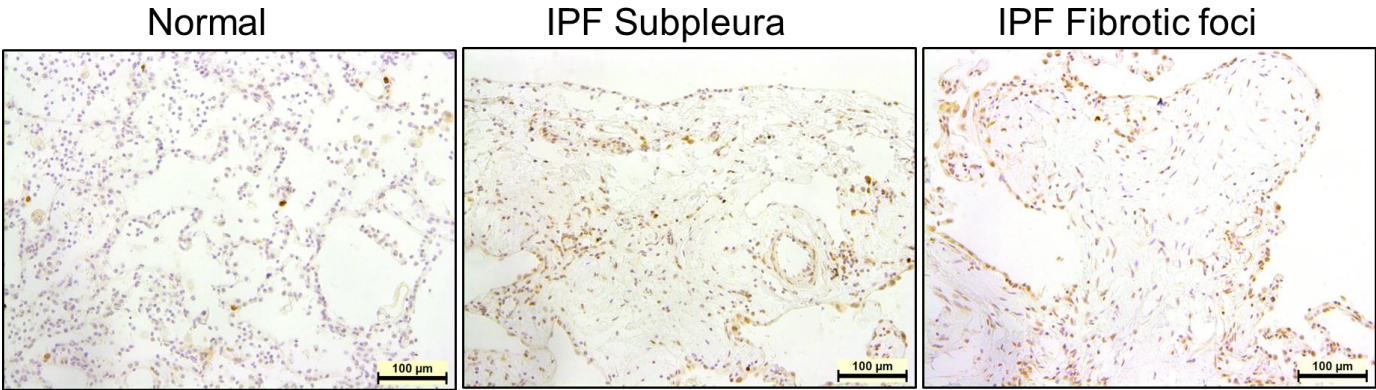

Panel C: Negative control

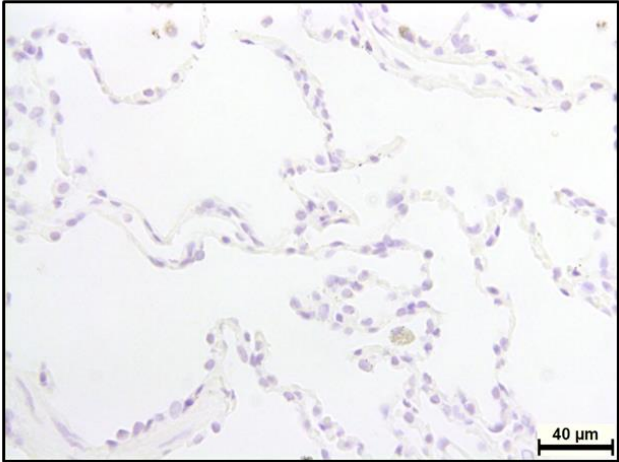

Panel E: Negative control

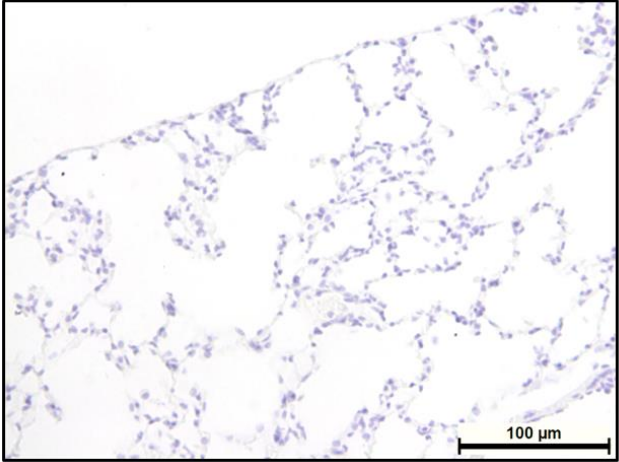

Supplement: EMMM-12-e12131-s003.pdf [file EMMM-12-e12131-s003.pdf]
