# Supplementary material for: Inhibition of Aurora Kinase B attenuates fibroblast activation and pulmonary fibrosis
Source: PubMed Central journal article supplement (PMC7507328; doi:10.15252/emmm.202012131), 2020-08-06

**Figure 3**

Panel H: Low magnification images

Normal Lung

Fibrotic Lung

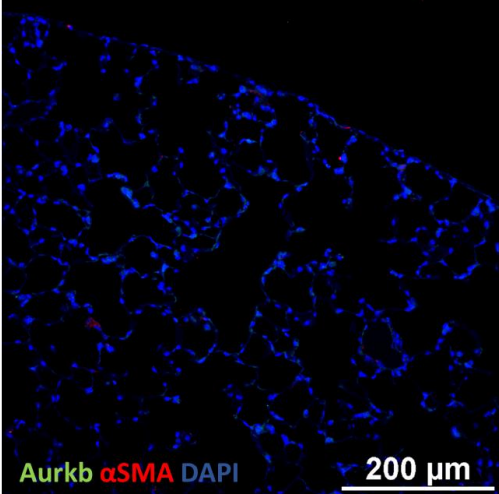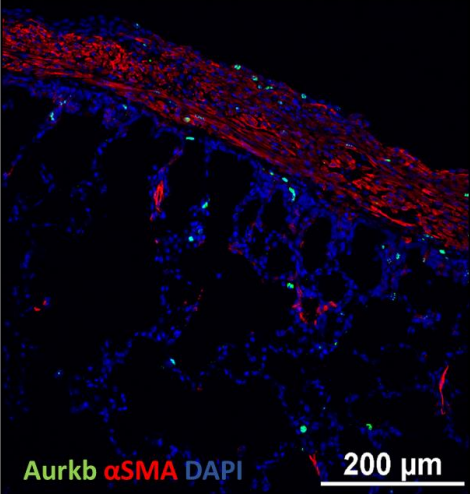

Panel C: Negative control

Panel H: Negative control

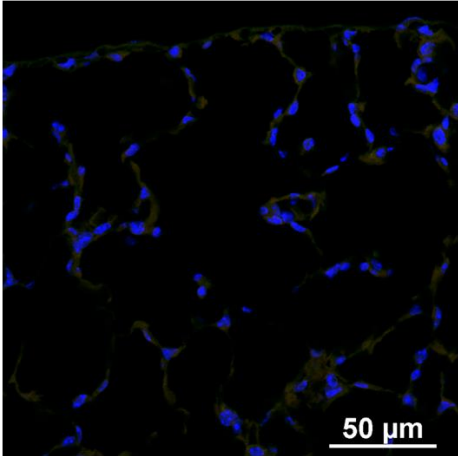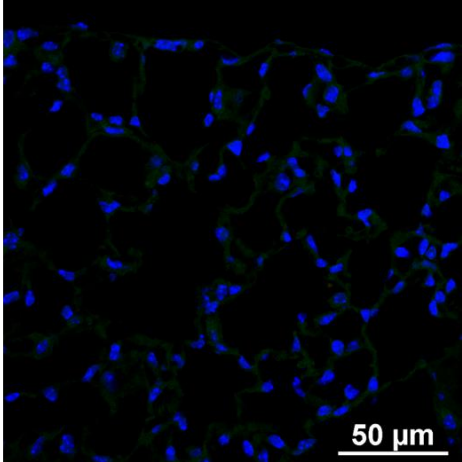

Supplement: EMMM-12-e12131-s005.pdf [file EMMM-12-e12131-s005.pdf]
