# Supplementary material for: Inhibition of Aurora Kinase B attenuates fibroblast activation and pulmonary fibrosis
Source: PubMed Central journal article supplement (PMC7507328; doi:10.15252/emmm.202012131), 2020-08-06

**Figure 6**

Panel A: Low magnification images

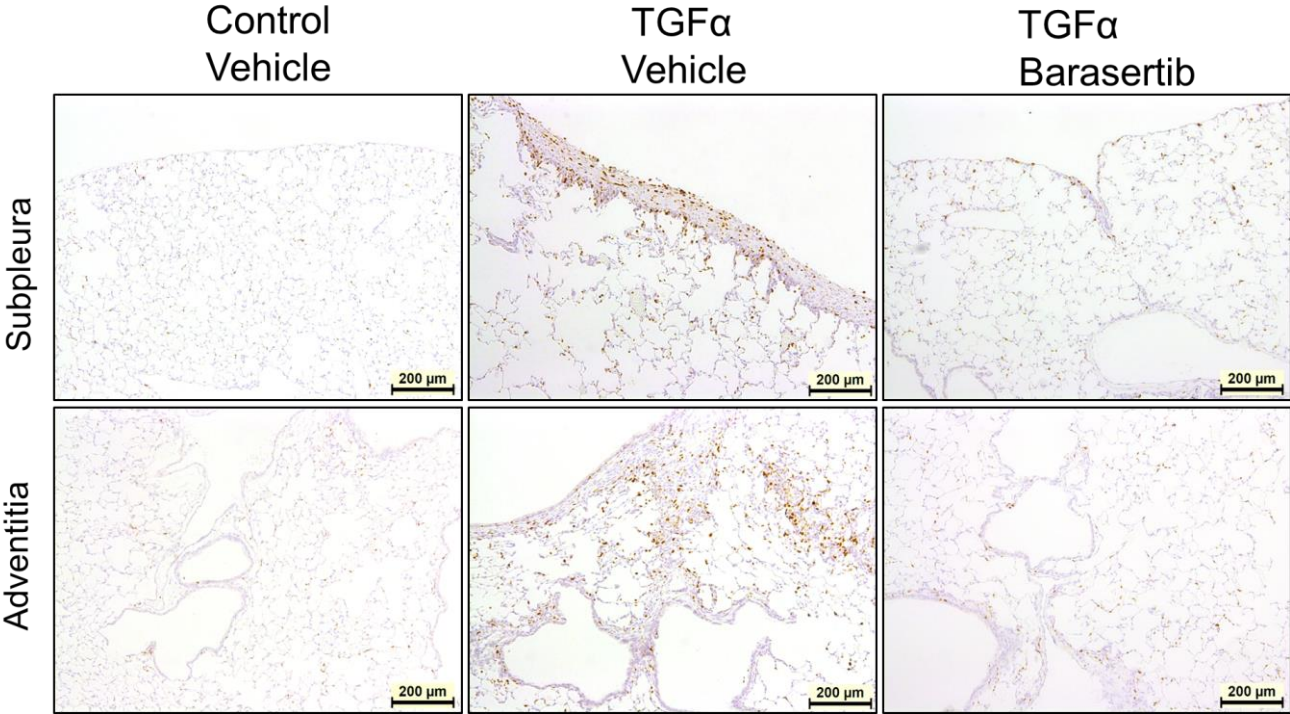

Panel A: Negative control

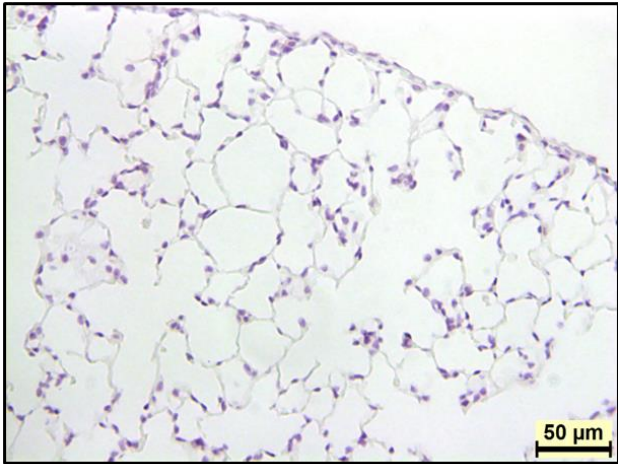

Panel B

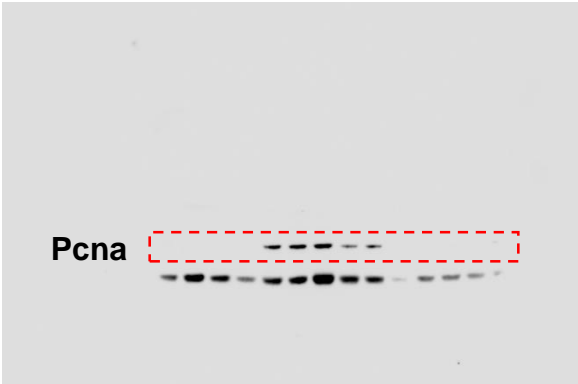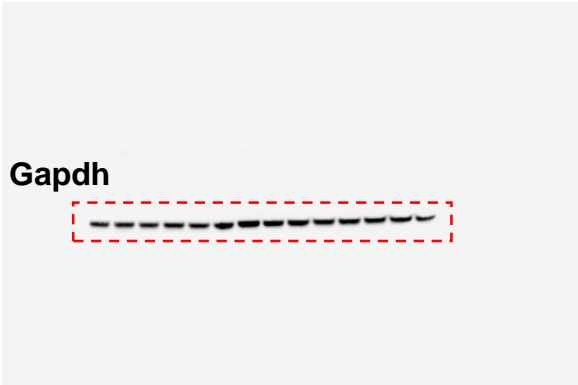

Supplement: EMMM-12-e12131-s006.pdf [file EMMM-12-e12131-s006.pdf]
