# Supplementary material for: Inhibition of Aurora Kinase B attenuates fibroblast activation and pulmonary fibrosis
Source: PubMed Central journal article supplement (PMC7507328; doi:10.15252/emmm.202012131), 2020-08-06
Supplement: EMMM-12-e12131-s007.pdf [file EMMM-12-e12131-s007.pdf]

# Inhibition of Aurora Kinase B attenuates fibroblast activation and pulmonary fibrosis

Rajesh Kasam, Sudhir Ghandikota, Divyalakshmi Soundararajan, G Bhanuprakash Reddy, Steven Huang, Anil Jegga, and Satish Madala

DOI: [10.15252/emmm.202012131](https://doi.org/10.15252/emmm.202012131)

Corresponding authors: Satish Madala ([satish.madala@cchmc.org](mailto:satish.madala@cchmc.org)) , Anil Jegga ([anil.jegga@cchmc.org](mailto:anil.jegga@cchmc.org))

---

## Review Timeline:

|                     |             |
|---------------------|-------------|
| Submission Date:    | 5th Feb 20  |
| Editorial Decision: | 24th Feb 20 |
| Revision Received:  | 13th Jun 20 |
| Editorial Decision: | 3rd Jul 20  |
| Revision Received:  | 8th Jul 20  |
| Accepted:           | 13th Jul 20 |

---

Editor: Zeljko Durdevic

## Transaction Report:

(Note: With the exception of the correction of typographical or spelling errors that could be a source of ambiguity, letters and reports are not edited. Depending on transfer agreements, referee reports obtained elsewhere may or may not be included in this compilation. Referee reports are anonymous unless the Referee chooses to sign their reports.)

24th Feb 2020

Dear Dr. Madala,

Thank you for the submission of your manuscript to EMBO Molecular Medicine. We have now heard back from the three referees who agreed to evaluate your manuscript. As you will see from the reports below, all referees found the study timely/of interest/ important for the field [anything positive]. Still, while referee 3 is supportive of publication, referees 1 and 2 raise a number of concerns. We would be happy to consider a major revision of this work particularly addressing the following items:

- Rationale for investigating the role of Aurora Kinase B in idiopathic pulmonary fibrosis (IPF)
- Justification of the used animal model and confirmation of the key findings in the standard IPF mouse model.

Please note that addressing all the other points raised by the referees as much as possible will be necessary for further considering the manuscript in our journal, and acceptance of the manuscript will entail a second round of review. Considering the extent of the revision, I am happy to extend the revisions time to 6 months. EMBO Molecular Medicine encourages a single round of revision only and therefore, acceptance or rejection of the manuscript will depend on the completeness of your responses included in the next, final version of the manuscript. For this reason, and to save you from any frustrations in the end, I would strongly advise against returning an incomplete revision.

\*\*\*\*\* Reviewer's comments \*\*\*\*\*

Referee #1 (Remarks for Author):

In their manuscript, Kasam et al, explore a possible role for Aurora kinase B in fibroblast activation and the pathogenesis of idiopathic pulmonary fibrosis, both in vitro and in vivo. Moreover, pharmacological inhibition of Aurora B with basasertib attenuated fibrotic disease in an animal model, both in a prophylactic, as well as in a therapeutic scheme of administration. The topic is novel and up to date. Although this reviewer was convinced on a likely role of Aurora B in IPF, there are several theoretical and technical concerns mentioned below. Moreover, the included mechanistic insights, essentially modulation of proliferation and apoptosis, are way too general.

Major

Investigating a possible role of Aurora B in IPF was not well justified. According to the web site of the authors, "Barasertib, an AURKB-selective inhibitor, was identified using an integrative systems biology based approach and computational screening", and not vice versa. Maybe the paper should be completely restructured highlighting the potential of similar approaches.

The choice of the model, Tg-TGF $\alpha$ , over more widely used models should be explained.

The reported leakiness of the tetracycline model should be discussed; Doxycycline and 5% DMSO are both anti-inflammatory, that can affect lung pathogenesis even upon fibrotic stimuli. Therefore, control littermate groups (CCSP-rtTA alone +/- dox, +/- 5% DMSO, TetO-CMV-TGF $\alpha$  alone +/- Dox +/- 5% DMSO) should be used in all relative mouse studies, at least once. I am afraid that there is no easy way around the extreme number of mice necessary to fully appreciate the results with this model.

Although IPF can be referred as a fibroproliferative disease, the issue remains controversial and many researchers do not agree with such a definition. The consensus is that fibroblasts in IPF "persist" or "accumulate" rather than "proliferate higher" or "apoptose less". Please elaborate citing relevant high impact publications and/or recent reviews.

Is there an effect in mitotic functions of IPF fibroblasts that well fit with the known functions of Aurora B? Can the results be possibly explained by differences in the cell cycle? Is the circadian rhythm possible involved? Senescence?

Minor

Why all fibroblasts present with increased proliferation, while only a small fraction stained positive for Aurora B (Fig. 3C)? Please include a few references on increased proliferation, as well as decreased apoptosis, of lung fibroblasts upon TGF $\alpha$  (or TGF $\beta$ , PDGF,...) stimulation.

Why the enzymatic inhibition of Aurora B leads to downregulation of its mRNA expression (Fig. 6C)?

The PK/PD profile of barasertib should be briefly mentioned to fully appreciate in vivo findings.

All graphs should be presented with scatter plots, rather than bar plots.

The number of repetitions for each experiment should be explicitly stated in each figure legend.

Negative controls (e.g isotype controls) should be included in a supplementary file for all IHC studies.

Additional supplementary figures should contain different magnifications of different parts of the fibrotic lung from mice and humans.

Fig. 1D. please show all 4 samples that were used for the quantification.

Sup Table 1 should include FCs, p, FDRs for all genes.

Referee #2 (Remarks for Author):

The study by Kasam et al demonstrates a novel pathological role for AurkB in fibroblast activation and pulmonary fibrosis. The major findings are that AurkB promotes myofibroblast activation and that pharmacological inhibition of this kinase effectively blocks development and progression of pulmonary fibrosis in mice. Investigators have also uncovered that Aurkb is regulated by WT1, which has important mechanistic implications. The manuscript is well written and findings are easily interpretable. The manuscript also incorporates data from human IPF tissues, increasing the clinical relevance of findings. Major criticisms are detailed below.

- 1) In figure 1, AurkB positive cells represent a small subset of mesenchymal cells in IPF tissues. This needs to be addressed somewhere in the manuscript. Perhaps a discussion of fibroblast heterogeneity could be added. Additionally it might be nice for investigators to quantify the number of AurkB positive and negative mesenchymal cells in tissues.
- 2) The TGF $\alpha$  is not a standard model of pulmonary fibrosis. The manuscript would be strengthened by using a standard model of pulmonary fibrosis, such as bleomycin.
- 3) Figure 7 does not show significant fibrosis in the untreated TGF $\alpha$  group. This needs to be addressed with better images.
- 4) Fibrosis in Figure 5 b subpleural TGF $\alpha$  image actually looks extrapleural. Can the authors confirm this is all subpleural?
- 5) Adventitial thickening is not a characteristic feature of pulmonary fibrosis. Please explain to the reader why this is relevant to IPF/ILD. This further illustrates the importance of using a standard model of pulmonary fibrosis.

Referee #3 (Remarks for Author):

I have been asked to review a very interesting manuscript by Drs Kasam and colleagues that reports on the role of Aurora Kinase B (AURKB) in fibroblast activation and pulmonary fibrosis. AURKB is associated with alignment and segregation of chromosomes during mitosis. The authors explore that AURKB might be important in fibroblast activation in pulmonary fibrosis. The author

show that stimulation of primary human lung fibroblasts by CTGF, TGF $\alpha$ , and IGF1 (but not TGF $\beta$ ) increases AURKB gene expression as measured at the mRNA level. In addition, higher levels of these transcripts were found in IPF fibroblasts compared to controls. It appears that more AURKB+ cells were observed by IH in IPF lungs. More AURKB (and not A) was observed in TGF $\alpha$ -overexpressing mice. The team then went on to knock down WT1 and show that silencing of WT1 decreased expression of AURKB. In addition overexpression of WT1 increased AURKB. Conserved WT1 sites were observed in the promoter region of both human and mouse AURKB. ChIP identified binding of a WT1 antibody to the AURKB gene, and a luciferase reporter was increased in WT1-overexpressing 293 cells. The team then employed a bioinformatic screen to look for overlapping genes in IPF lungs and siAURKB treated fibroblasts. Focusing on negative correlated genes, the team identified several potential AURKB-driven processes including cell proliferation, apoptosis, and ECM production.

This is a very solid manuscript which combines multiple modalities to establish the argument that AURKB is an important regulator of fibroblast activation in pulmonary fibrosis. Loss of- and gain of-function approaches complement a beautiful correlation with human gene expression data. This manuscript has potentially very high translational impact.

#### MAJOR COMMENTS

1. The majority of my comments relate to rationale. The team members are well known students of TGF $\alpha$  signaling and WT1 biology. Was AURKB identified by ChIP-Seq or RNA-Seq in a previous manuscript? I think the already strong impact of the manuscript would be enhanced by a strong rationale for pursuing AURKB.

#### MINOR COMMENTS

1. Many journals are requesting dot plots for data with fewer than N=10.

Point-by-point response to the reviewer comments:

**Referee #1** (Remarks for Author):

In their manuscript, Kasam et al, explore a possible role for Aurora kinase B in fibroblast activation and the pathogenesis of idiopathic pulmonary fibrosis, both in vitro and in vivo. Moreover, pharmacological inhibition of Aurora B with barasertib attenuated fibrotic disease in an animal model, both in a prophylactic, as well as in a therapeutic scheme of administration. The topic is novel and up to date. Although this reviewer was convinced on a likely role of Aurora B in IPF, there are several theoretical and technical concerns mentioned below. Moreover, the included mechanistic insights, essentially modulation of proliferation and apoptosis, are way too general.

Response: We appreciate the reviewer comment regarding the novelty of our data on the role of Aurora kinase B (AURKB) in fibroblast activation and the use of AURKB inhibitor, barasertib, as a compound to modulate fibroproliferation, myofibroblast survival and ECM production. Also, we thank the reviewer for the additional comments that have helped us to improve the manuscript.

**Major**

Investigating a possible role of Aurora B in IPF was not well justified. According to the web site of the authors, "Barasertib, an AURKB-selective inhibitor, was identified using an integrative systems biology based approach and computational screening", and not vice versa. Maybe the paper should be completely restructured highlighting the potential of similar approaches.

Response: We now provide more insights on the rationale to investigate the role of AURKB in IPF and we believe that the rationale to support our hypothesis is two-fold. First, the current study on AURKB is a follow up study to our earlier publications on Wilms Tumor 1(WT1)-induced fibroblast activation in pulmonary fibrosis (PMID: 26371248 & 30135315). In particular, RNA-seq analysis of fibroblasts with the knockdown of WT1 identified AURKB as a potential downstream target of WT1 in mediating some, if not all, of the pro-fibrotic processes (PMID: 30135315). Second, we identified Tozasertib, a pan aurora kinase inhibitor as a potential anti-fibrotic candidate (PMID: 28239659). In this study, we queried IPF gene signatures using connectivity map approach against the LINCS database (<http://www.lincscloud.org/>), a massive catalog of gene-expression profiles collected from human cells treated with chemical and genetic perturbagens (PMID: 28239659). Based on findings from these two independent studies, we further characterized the expression of Aurora kinase isoforms in IPF and TGF $\alpha$  mouse model which we believe have helped us to develop a rationale to target AURKB using barasertib. We have now cited our previous findings and modified text accordingly in introduction of revised manuscript (Page 4; Lanes 13-19).

The choice of the model, Tg-TGF $\alpha$ , over more widely used models should be explained. The reported leakiness of the tetracycline model should be discussed; Doxycycline and 5% DMSO are both anti-inflammatory that can affect lung pathogenesis even upon fibrotic stimuli. Therefore, control littermate groups (CCSP-rtTA alone +/- dox, +/- 5% DMSO,

TetO-CMV-TGF $\alpha$  alone +/- Dox +/- 5% DMSO) should be used in all relative mouse studies, at least once. I am afraid that there is no easy way around the extreme number of mice necessary to fully appreciate the results with this model.

Response: Published studies have shown increased levels of TGF $\alpha$  and other EGFR ligand in the lung lavage fluid of IPF patients compared to healthy controls (PMID: 10207942 ). EGFR has been shown activated by several profibrotic agents including TGF $\beta$ , TNF $\alpha$ , and IL-13 (PMID:23086930; PMID:11726400; PMID:10623834). In support, overexpression of TGF $\alpha$  in mice has resulted in the development of pathologic fibrotic lesions similar to those found in IPF, including increased fibroproliferation, survival and subpleural fibrosis migrating into the interstitium, differentiation of myofibroblasts, and formation of fibroblastic foci (PMID:20676040; PMID:31156440). Moreover, gene expression profiles after expression of TGF $\alpha$  were more similar to IPF samples compared to that of a bleomycin model (PMID: 17496152; PMID: 31156440). Therefore, the TGF $\alpha$ -TG mouse is a reliable preclinical model to assess fibroblast activation involved in pulmonary fibrosis. Also, we were able to replicate our findings with a TGF $\alpha$  model on barasertib therapy using a widely used mouse model of bleomycin-induced pulmonary fibrosis (Figure 8). We included changes in the text with the details on relevance of TGF $\alpha$  model to study pulmonary fibrosis (Page 17; Lanes 3-19).

We agree with the reviewer that off-target effects of rtTA and Dox are important factors to consider the effects of transgene and anti-fibrotic therapy (PMID:20676040; PMID:22180870). As suggested by the reviewer, we now performed in vivo studies to assess possible anti-inflammatory effects of Doxycycline and DMSO using appropriate control mice (CCSP-rtTA mice and TetO-CMV-TGF $\alpha$  mice). In agreement with our previous studies, no gross changes in inflammation or fibrosis were observed with the long-term treatment of DMSO or doxycycline (Appendix Fig S2).

Although IPF can be referred as a fibroproliferative disease, the issue remains controversial and many researchers do not agree with such a definition. The consensus is that fibroblasts in IPF "persist" or "accumulate" rather than "proliferate higher" or "apoptosis less". Please elaborate citing relevant high impact publications and/or recent reviews. Is there an effect in mitotic functions of IPF fibroblasts that well fit with the known functions of Aurora B? Can the results be possibly explained by differences in the cell cycle? Is the circadian rhythm possible involved? Senescence?

Response: We agree with the reviewer that the mature fibrotic lung lesions show limited proliferation as these lesions are dominated by apoptosis resistant myofibroblasts that produce increased amounts of collagen. However, it has been observed that there is a significant increase in the number of proliferating fibroblasts predominantly in the early fibrotic lung lesions including expanding areas of fibrotic foci (PMID: 28530639). Although fibroproliferation may play a more diminished role in established fibrosis, it may still play an important role in early fibrotic lesions, where expansion and accumulation of fibroblasts is occurring. IPF lung tissue is histologically heterogenous containing normal-appearing parenchyma with early fibrotic lesions of thickened alveolar walls adjacent to advanced scar tissue with honeycombing and bronchiolization (PMID: 25217476). Recent single cell RNA seq studies further support molecular and functional heterogeneity in stromal cells

that accumulate in these fibrotic lesions (PMID: 32317643; PMID: 30554520; PMID: 29590628). Our new findings suggesting that barasertib therapy is effective in reducing fibrosis burden in part could be due to its ability to block both fibroproliferation and myofibroblast survival. Therefore, AURKB inhibition by barasertib is more effective in reducing early and established fibrotic lung lesions.

Mitosis is a highly regulated process in which AURKB plays an essential role by orchestrating connections between spindle microtubules and kinetochores, facilitating the proliferation. With the progression of fibrosis, the local fibroblasts transform to myofibroblasts that had initially proliferated, in part mediated by AURKB. Myofibroblasts in the mature fibrotic lesions have been shown to acquire a senescent phenotype that might play a pathogenic role in pulmonary fibrosis (PMID:28230051). We have not assessed whether AURKB-positive myofibroblasts that accumulate in fibrotic lesions exhibit any molecular features of cellular senescence. However, our RNA seq analysis of AURKB-deficient fibroblasts revealed significant transcriptomic differences, particularly in genes associated with proliferation, apoptosis, and ECM, suggesting that AURKB could be a fibrogenic factor with a limited role in myofibroblast senescence. In the revision, we have expanded our discussion on possible AURKB-driven effects on cell cycle, apoptosis and senescence (Page 18; Lanes 10-17).

### **Minor**

Why all fibroblasts present with increased proliferation, while only a small fraction stained positive for Aurora B (Fig. 3C)? Please include a few references on increased proliferation, as well as decreased apoptosis, of lung fibroblasts upon TGF $\alpha$  (or TGF $\beta$ , PDGF,...) stimulation.

Response: Fewer AURKB-positive fibroblasts could be due to differences in the expression of Ki67 and AURKB in dividing cells. While Ki67 is expressed during all active phases of the cell cycle (G1, S, G2 and mitosis), AURKB expression increases selectively during G2-M transition. Also, other factors might be mediating fibroproliferation in a subset of fibroblasts supporting their molecular heterogeneity. We now include references that support the role of TGF $\alpha$  and other growth factors in increased proliferation and reduced apoptosis of fibroblasts (PMID: 11524244).

Why the enzymatic inhibition of Aurora B leads to downregulation of its mRNA expression (Fig. 6C)?

Response: We assessed WT1 levels that involved in AURKB expression in fibroblasts treated with AURKB inhibitor. Our new data suggest a significant decrease in WT1 transcripts with AURKB inhibition (Fig EV5). However, we do not know mechanisms underlying the observed decrease in WT1 transcripts with AURKB inhibition. Future studies are therefore warranted to identify mechanisms in barasertib-regulated AURKB/WT1 expression.

The PK/PD profile of barasertib should be briefly mentioned to fully appreciate in vivo findings.



Response: We have revised the manuscript to describe the PK/PD profile of barasertib (Page 20; Lanes 1-6).

All graphs should be presented with scatter plots, rather than bar plots.

Response: We have changed all bar graphs to scatter plots in the revised manuscript.

The number of repetitions for each experiment should be explicitly stated in each figure legend.

Response: Appropriate changes were made in the revised manuscript.

Negative controls (e.g isotype controls) should be included in a supplementary file for all IHC studies.

Response: As suggested images with isotype control staining are included (Appendix Fig S4)

Additional supplementary figures should contain different magnifications of different parts of the fibrotic lung from mice and humans.

Response: As suggested by the reviewer, we now include low magnification images in Appendix Fig S3.

Fig. 1D. Please show all 4 samples that were used for the quantification.

Response: We now provide data on additional samples used for the quantification of Aurkb and Aurka as Appendix Fig S1.

Sup Table 1 should include FCs, p, FDRs for all genes.

Response: We now include suggested changes to the table S1 in the revised manuscript.

**Referee #2** (Remarks for Author):

The study by Kasam et al demonstrates a novel pathological role for AurkB in fibroblast activation and pulmonary fibrosis. The major findings are that AurkB promotes myofibroblast activation and that pharmacological inhibition of this kinase effectively blocks development and progression of pulmonary fibrosis in mice. Investigators have also uncovered that Aurkb is regulated by WT1, which has important mechanistic implications. The manuscript is well written and findings are easily interpretable. The manuscript also incorporates data from human IPF tissues, increasing the clinical relevance of findings. Major criticisms are detailed below.

Overall Response: We thank the reviewer for suggestions that have substantially helped us to improve the revised version of our manuscript.

1) In figure 1, AurkB positive cells represent a small subset of mesenchymal cells in IPF tissues. This needs to be addressed somewhere in the manuscript. Perhaps a discussion of fibroblast heterogeneity could be added. Additionally it might be nice for investigators to quantify the number of AurkB positive and negative mesenchymal cells in tissues.

[Response:](#) We agree with the reviewer that a subset of mesenchymal cells express Aurora B (Fig 1C) and we now discussed the heterogeneity of fibroblasts including AURKB-positive fibroblasts in the revised manuscript (Page 18; Lanes 13-17). Unfortunately, we did not quantify the number of AURKB-positive mesenchymal cells due to the lack of co-staining with mesenchymal cell markers.

2) The TGF $\alpha$  is not a standard model of pulmonary fibrosis. The manuscript would be strengthened by using a standard model of pulmonary fibrosis, such as bleomycin.

[Response:](#) We would like to thank the reviewer for the suggestion to measure the effects of barasertib using bleomycin model. We have carried out several additional experiments to further test in vivo efficacy of barasertib to attenuate ongoing fibrosis in a chronic mouse model of bleomycin-induced pulmonary fibrosis. These studies showed that barasertib attenuates collagen deposition (Fig 8). Also, we observed a significant decrease in the expression of genes involved in fibroblast activation. When viewed in combination with in vivo data using TGF $\alpha$  model, these data are consistent with the concept that AURKB inhibition with barasertib is an effective therapy to attenuate fibroblast activation and pulmonary fibrosis.

3) Figure 7 does not show significant fibrosis in the untreated TGF $\alpha$  group. This needs to be addressed with better images.

[Response:](#) We now include modified images to reflect fibrosis in the untreated TGF $\alpha$  group (Fig 7D).

4) Fibrosis in Figure 5 b subpleural TGF $\alpha$  image actually looks extrapleural. Can the authors confirm this is all subpleural?

[Response:](#) Our published studies have demonstrated that these lesions are subpleural and express mesenchymal markers but are negative for mesothelial cell markers (PMID: 30135315).

5) Adventitial thickening is not a characteristic feature of pulmonary fibrosis. Please explain to the reader why this is relevant to IPF/ILD. This further illustrates the importance of using a standard model of pulmonary fibrosis.

[Response:](#) We agree with the reviewer and understand the limitations with preclinical models available to study IPF. We performed additional studies on testing barasertib using a chronic mouse model of bleomycin-induced pulmonary fibrosis (PMID:28775096). These new data suggest a significant decrease bleomycin-induced pulmonary fibrosis in

mice treated with barasertib compared to vehicle treated control mice. These new findings have been clearly stated in the revised version (Fig 8).

Referee #3 (Remarks for Author):

I have been asked to review a very interesting manuscript by Drs Kasam and colleagues that reports on the role of Aurora Kinase B (AURKB) in fibroblast activation and pulmonary fibrosis. AURKB is associated with alignment and segregation of chromosomes during mitosis. The authors explore that AURKB might be important in fibroblast activation in pulmonary fibrosis. The authors show that stimulation of primary human lung fibroblasts by CTGF, TGF $\alpha$ , and IGF1 (but not TGF $\beta$ ) increases AURKB gene expression as measured at the mRNA level. In addition, higher levels of these transcripts were found in IPF fibroblasts compared to controls. It appears that more AURKB+ cells were observed by IH in IPF lungs. More AURKB (and not A) was observed in TGF $\alpha$ -overexpressing mice. The team then went on to knock down WT1 and show that silencing of WT1 decreased expression of AURKB. In addition overexpression of WT1 increased AURKB. Conserved WT1 sites were observed in the promoter region of both human and mouse AURKB. ChIP identified binding of a WT1 antibody to the AURKB gene, and a luciferase reporter was increased in WT1-overexpressing 293 cells. The team then employed a bioinformatic screen to look for overlapping genes in IPF lungs and siAURKB treated fibroblasts. Focusing on negative correlated genes, the team identified several potential AURKB-driven processes including cell proliferation, apoptosis, and ECM production. This is a very solid manuscript which combines multiple modalities to establish the argument that AURKB is an important regulator of fibroblast activation in pulmonary fibrosis. Loss of- and gain of-function approaches complement a beautiful correlation with human gene expression data. This manuscript has potentially very high translational impact.

Response: We thank the reviewer for the comprehensive review and positive feedback on our manuscript.

## MAJOR COMMENTS

1. The majority of my comments relate to rationale. The team members are well known students of TGF $\alpha$  signaling and WT1 biology. Was AURKB identified by ChIP-Seq or RNA-Seq in a previous manuscript? I think the already strong impact of the manuscript would be enhanced by a strong rationale for pursuing AURKB.

Response: This is an excellent suggestion and we revised our manuscript to highlight the rationale behind this study. In particular, our RNA-seq analysis of transcripts with the knockdown of WT1 have identified AURKB as a potential WT1 target gene involved in fibroblast activation. Also, our recent study using pharmacogenomic screens identified AURK inhibitors to attenuate fibroblast activation in IPF. As further discussed in the response to Reviewer 1 (Major point#1), we have significantly revised our text in the introduction to highlight the rationale for pursuing AURKB (Pages 4-5).

## MINOR COMMENTS

1. Many journals are requesting dot plots for data with fewer than  $N=10$ .  
Response: Data are changed to dot plots in the revised manuscript as suggested by the reviewer.

3rd Jul 2020

Dear Dr. Madala,

Thank you for the submission of your revised manuscript to EMBO Molecular Medicine. I am pleased to inform you that we will be able to accept your manuscript pending the following final amendments.

\*\*\*\*\* Reviewer's comments \*\*\*\*\*

Referee #1 (Remarks for Author):

no further comments

Referee #2 (Remarks for Author):

The authors have addressed all previous criticisms.

We like to thank editor for accepting our manuscript for publication in EMBO molecular medicine. As suggested, we now include modifications needed to the text and also high resolution images.

The authors performed the requested changes.

**YOU MUST COMPLETE ALL CELLS WITH A PINK BACKGROUND** ↓

PLEASE NOTE THAT THIS CHECKLIST WILL BE PUBLISHED ALONGSIDE YOUR PAPER

Corresponding Author Name: Satish K Madala

Journal Submitted to: EMBO Molecular Medicine

Manuscript Number: EMM-2020-12131

### Reporting Checklist For Life Sciences Articles (Rev. June 2017)

This checklist is used to ensure good reporting standards and to improve the reproducibility of published results. These guidelines are consistent with the Principles and Guidelines for Reporting Preclinical Research issued by the NIH in 2014. Please follow the journal's authorship guidelines in preparing your manuscript.

#### A- Figures

##### 1. Data

The data shown in figures should satisfy the following conditions:

- the data were obtained and processed according to the field's best practice and are presented to reflect the results of the experiments in an accurate and unbiased manner.
- figure panels include only data points, measurements or observations that can be compared to each other in a scientifically meaningful way.
- graphs include clearly labeled error bars for independent experiments and sample sizes. Unless justified, error bars should not be shown for technical replicates.
- if  $n < 5$ , the individual data points from each experiment should be plotted and any statistical test employed should be justified.
- Source Data should be included to report the data underlying graphs. Please follow the guidelines set out in the author ship guidelines on Data Presentation.

##### 2. Captions

Each figure caption should contain the following information, for each panel where they are relevant:

- a specification of the experimental system investigated (eg cell line, species name).
- the assay(s) and method(s) used to carry out the reported observations and measurements
- an explicit mention of the biological and chemical entity(ies) that are being measured.
- an explicit mention of the biological and chemical entity(ies) that are altered/ varied/ perturbed in a controlled manner.
- the exact sample size (n) for each experimental group/condition, given as a number, not a range;
- a description of the sample collection allowing the reader to understand whether the samples represent technical or biological replicates (including how many animals, litters, cultures, etc.).
- a statement of how many times the experiment shown was independently replicated in the laboratory.
- definitions of statistical methods and measures:
  - common tests, such as t-test (please specify whether paired vs. unpaired), simple  $\chi^2$  tests, Wilcoxon and Mann-Whitney tests, can be unambiguously identified by name only, but more complex techniques should be described in the methods section;
  - are tests one-sided or two-sided?
  - are there adjustments for multiple comparisons?
  - exact statistical test results, e.g., P values = x but not P values < x;
  - definition of 'center values' as median or average;
  - definition of error bars as s.d. or s.e.m.

Any descriptions too long for the figure legend should be included in the methods section and/or with the source data.

In the pink boxes below, please ensure that the answers to the following questions are reported in the manuscript itself. Every question should be answered. If the question is not relevant to your research, please write NA (non applicable). We encourage you to include a specific subsection in the methods section for statistics, reagents, animal models and human subjects.

#### B- Statistics and general methods

Please fill out these boxes ↓ (Do not worry if you cannot see all your text once you press return)

|                                                                                                                                                                                         |                                                                                                                                                                                                                                                                                                                   |
|-----------------------------------------------------------------------------------------------------------------------------------------------------------------------------------------|-------------------------------------------------------------------------------------------------------------------------------------------------------------------------------------------------------------------------------------------------------------------------------------------------------------------|
| 1.a. How was the sample size chosen to ensure adequate power to detect a pre-specified effect size?                                                                                     | We used the sample size of seven to ten per group based on our published studies using preclinical mouse model of pulmonary fibrosis.                                                                                                                                                                             |
| 1.b. For animal studies, include a statement about sample size estimate even if no statistical methods were used.                                                                       | The power analysis method for estimating sample size for animal studies was to detect significant differences between saline and fibrosis treatment, using independent two sample t-tests at alpha equal to 0.05 with 90 percent power. The sample size calculations yielded a number of mice per group at seven. |
| 2. Describe inclusion/exclusion criteria if samples or animals were excluded from the analysis. Were the criteria pre-established?                                                      | We didn't exclude animals from the analysis for key endpoints.                                                                                                                                                                                                                                                    |
| 3. Were any steps taken to minimize the effects of subjective bias when allocating animals/samples to treatment (e.g. randomization procedure)? If yes, please describe.                | To avoid bias between experimental groups all samples were blinded and coded to investigators for histological evaluations.                                                                                                                                                                                       |
| For animal studies, include a statement about randomization even if no randomization was used.                                                                                          | We considered sex as a biological variable and randomized both male and females animals in groups to analyze animal data in aggregate.                                                                                                                                                                            |
| 4.a. Were any steps taken to minimize the effects of subjective bias during group allocation or/and when assessing results (e.g. blinding of the investigator)? If yes please describe. | Yes, the details of experimental groups were blinded to investigators for biochemical and histological evaluations.                                                                                                                                                                                               |
| 4.b. For animal studies, include a statement about blinding even if no blinding was done                                                                                                | The details of experimental groups were blinded to the investigator involved in measurements.                                                                                                                                                                                                                     |
| 5. For every figure, are statistical tests justified as appropriate?                                                                                                                    | Statistical analyses were performed using GraphPad Prism. We used t-test to compare between two groups and one-way ANOVA with Turkey's multiple comparison post-test to compare between more than two experimental groups.                                                                                        |
| Do the data meet the assumptions of the tests (e.g., normal distribution)? Describe any methods used to assess it.                                                                      | YES. Statistical analyses were performed using GraphPad Prism and data meet the assumptions.                                                                                                                                                                                                                      |

#### USEFUL LINKS FOR COMPLETING THIS FORM

<http://www.antibodypedia.com>  
<http://1degrebio.org>  
<http://www.equator-network.org/reporting-guidelines/improving-bioscience-research-repor>  
  
<http://grants.nih.gov/grants/olaw/olaw.htm>  
<http://www.mrc.ac.uk/Ourresearch/Ethicsresearchguidance/Useofanimals/index.htm>  
<http://ClinicalTrials.gov>  
<http://www.consort-statement.org>  
<http://www.consort-statement.org/checklists/view/32-consort/66-title>  
  
<http://www.equator-network.org/reporting-guidelines/reporting-recommendations-for-tum>  
  
<http://datadryad.org>  
  
<http://figshare.com>  
  
<http://www.ncbi.nlm.nih.gov/gap>  
  
<http://www.ebi.ac.uk/ega>  
  
<http://biomodels.net/>  
  
<http://biomodels.net/miriam/>  
<http://ij.biochem.sun.ac.za>  
[http://oba.od.nih.gov/biosecurity/biosecurity\\_documents.html](http://oba.od.nih.gov/biosecurity/biosecurity_documents.html)  
<http://www.selectagents.gov/>



|                                                                                   |                                                |
|-----------------------------------------------------------------------------------|------------------------------------------------|
| Is there an estimate of variation within each group of data?                      | All data was expressed as the mean SD.         |
| Is the variance similar between the groups that are being statistically compared? | YES. The details are included for all figures. |

### C- Reagents

|                                                                                                                                                                                                                                                                                                                              |                                                                                           |
|------------------------------------------------------------------------------------------------------------------------------------------------------------------------------------------------------------------------------------------------------------------------------------------------------------------------------|-------------------------------------------------------------------------------------------|
| 6. To show that antibodies were profiled for use in the system under study (assay and species), provide a citation, catalog number and/or clone number, supplementary information or reference to an antibody validation profile. e.g., Antibodypedia (see link list at top right), 1DegreeBio (see link list at top right). | We provided references and table with catalogue number and dilutions used.                |
| 7. Identify the source of cell lines and report if they were recently authenticated (e.g., by STR profiling) and tested for mycoplasma contamination.                                                                                                                                                                        | HEK293 cell line used was authenticated and tested negative for mycoplasma contamination. |

\* for all hyperlinks, please see the table at the top right of the document

### D- Animal Models

|                                                                                                                                                                                                                                                                                                                                                                                    |                                                                                                                                                                                                                                                                                                                                                                                                                      |
|------------------------------------------------------------------------------------------------------------------------------------------------------------------------------------------------------------------------------------------------------------------------------------------------------------------------------------------------------------------------------------|----------------------------------------------------------------------------------------------------------------------------------------------------------------------------------------------------------------------------------------------------------------------------------------------------------------------------------------------------------------------------------------------------------------------|
| 8. Report species, strain, gender, age of animals and genetic modification status where applicable. Please detail housing and husbandry conditions and the source of animals.                                                                                                                                                                                                      | All the mice were housed under specific-pathogen-free conditions, and all animal experiments were performed under protocols approved by the Institutional Animal Care and Use Committee of the Cincinnati Children's Hospital Research Foundation. Mice were housed no more than four per cage and cage bedding changed weekly. Both male and female gender mice at age 10-16 wks were used for all the experiments. |
| 9. For experiments involving live vertebrates, include a statement of compliance with ethical regulations and identify the committee(s) approving the experiments.                                                                                                                                                                                                                 | All animal protocols were reviewed by IACUC committee of Cincinnati Children's Hospital Medical Center. Animal care was conducted by trained technicians and supervised by an AALAC Board Certified veterinarian.                                                                                                                                                                                                    |
| 10. We recommend consulting the ARRIVE guidelines (see link list at top right) (PLoS Biol. 8(6), e1000412, 2010) to ensure that other relevant aspects of animal studies are adequately reported. See author guidelines, under 'Reporting Guidelines'. See also: NIH (see link list at top right) and MRC (see link list at top right) recommendations. Please confirm compliance. | We confirm our compliance with reporting guidelines.                                                                                                                                                                                                                                                                                                                                                                 |

### E- Human Subjects

|                                                                                                                                                                                                                                                                                                                    |                                                                                                                                                                                                                                     |
|--------------------------------------------------------------------------------------------------------------------------------------------------------------------------------------------------------------------------------------------------------------------------------------------------------------------|-------------------------------------------------------------------------------------------------------------------------------------------------------------------------------------------------------------------------------------|
| 11. Identify the committee(s) approving the study protocol.                                                                                                                                                                                                                                                        | The Institutional Review Board (Federal Assurance # 00002988) of Cincinnati Children's Hospital Medical Center acknowledges and determined that this study does not meet regulatory criteria for research involving human subjects. |
| 12. Include a statement confirming that informed consent was obtained from all subjects and that the experiments conformed to the principles set out in the WMA Declaration of Helsinki and the Department of Health and Human Services Belmont Report.                                                            | Not applicable                                                                                                                                                                                                                      |
| 13. For publication of patient photos, include a statement confirming that consent to publish was obtained.                                                                                                                                                                                                        | Not applicable                                                                                                                                                                                                                      |
| 14. Report any restrictions on the availability (and/or on the use) of human data or samples.                                                                                                                                                                                                                      | Not applicable                                                                                                                                                                                                                      |
| 15. Report the clinical trial registration number (at ClinicalTrials.gov or equivalent), where applicable.                                                                                                                                                                                                         | Not applicable                                                                                                                                                                                                                      |
| 16. For phase II and III randomized controlled trials, please refer to the CONSORT flow diagram (see link list at top right) and submit the CONSORT checklist (see link list at top right) with your submission. See author guidelines, under 'Reporting Guidelines'. Please confirm you have submitted this list. | Not applicable                                                                                                                                                                                                                      |
| 17. For tumor marker prognostic studies, we recommend that you follow the REMARK reporting guidelines (see link list at top right). See author guidelines, under 'Reporting Guidelines'. Please confirm you have followed these guidelines.                                                                        | Not applicable                                                                                                                                                                                                                      |

### F- Data Accessibility

|                                                                                                                                                                                                                                                                                                                                                                                                                                                                                                                                                                                                                                                                                                    |                                                                 |
|----------------------------------------------------------------------------------------------------------------------------------------------------------------------------------------------------------------------------------------------------------------------------------------------------------------------------------------------------------------------------------------------------------------------------------------------------------------------------------------------------------------------------------------------------------------------------------------------------------------------------------------------------------------------------------------------------|-----------------------------------------------------------------|
| 18. Provide a "Data Availability" section at the end of the Materials & Methods, listing the accession codes for data generated in this study and deposited in a public database (e.g. RNA-Seq data: Gene Expression Omnibus GSE39462, Proteomics data: PRIDE PXD000208 etc.) Please refer to our author guidelines for 'Data Deposition'.<br><br>Data deposition in a public repository is mandatory for:<br>a. Protein, DNA and RNA sequences<br>b. Macromolecular structures<br>c. Crystallographic data for small molecules<br>d. Functional genomics data<br>e. Proteomics and molecular interactions                                                                                         | Not applicable                                                  |
| 19. Deposition is strongly recommended for any datasets that are central and integral to the study; please consider the journal's data policy. If no structured public repository exists for a given data type, we encourage the provision of datasets in the manuscript as a Supplementary Document (see author guidelines under 'Expanded View' or in unstructured repositories such as Dryad (see link list at top right) or Figshare (see link list at top right).                                                                                                                                                                                                                             | Expanded view figures and supplementary data document provided. |
| 20. Access to human clinical and genomic datasets should be provided with as few restrictions as possible while respecting ethical obligations to the patients and relevant medical and legal issues. If practically possible and compatible with the individual consent agreement used in the study, such data should be deposited in one of the major public access-controlled repositories such as dbGAP (see link list at top right) or EGA (see link list at top right).                                                                                                                                                                                                                      | Not applicable                                                  |
| 21. Computational models that are central and integral to a study should be shared without restrictions and provided in a machine-readable form. The relevant accession numbers or links should be provided. When possible, standardized format (SBML, CellML) should be used instead of scripts (e.g., MATLAB). Authors are strongly encouraged to follow the MIRIAM guidelines (see link list at top right) and deposit their model in a public database such as Biocompare (see link list at top right) or JWS Online (see link list at top right). If computer source code is provided with the paper, it should be deposited in a public repository or included in supplementary information. | Not applicable                                                  |

### G- Dual use research of concern

|                                                                                                                                                                                                                                                                                               |                |
|-----------------------------------------------------------------------------------------------------------------------------------------------------------------------------------------------------------------------------------------------------------------------------------------------|----------------|
| 22. Could your study fall under dual use research restrictions? Please check biosecurity documents (see link list at top right) and list of select agents and toxins (APHIS/CDC (see link list at top right)). According to our biosecurity guidelines, provide a statement only if it could. | Not applicable |
|-----------------------------------------------------------------------------------------------------------------------------------------------------------------------------------------------------------------------------------------------------------------------------------------------|----------------|
